1 **DksA controls the response of the Lyme disease spirochete *Borrelia burgdorferi* to starvation**

2

3 William K. Boyle<sup>1,4</sup>, Ashley M. Groshong<sup>2</sup>, Dan Drecktrah<sup>3</sup>, Julie A. Boylan<sup>4,6</sup>, Frank C. Gherardini<sup>4</sup>, Jon S.  
4 Blevins<sup>5</sup>, D. Scott Samuels<sup>3</sup>, and Travis J. Bourret<sup>1\*</sup>

5

6 <sup>1</sup>Department of Medical Microbiology and Immunology, Creighton University, Omaha, NE, United States.

7 <sup>2</sup>Department of Medicine, UConn Health, Farmington, CT, United States.

8 <sup>3</sup>Division of Biological Sciences, University of Montana, Missoula, MT, United States.

9 <sup>4</sup>Laboratory of Bacteriology, Gene Regulation Section, Division of Intramural Research, Rocky Mountain  
10 Laboratories, National Institute of Allergy and Infectious Diseases, National Institutes of Health,  
11 Hamilton, MT, United States.

12 <sup>5</sup>Department of Microbiology and Immunology, University of Arkansas for Medical Sciences, Little Rock,  
13 AR, United States.

14

15 <sup>6</sup>Current Address:

16 Defense Threat Reduction Agency

17 8725 John Kingman Road

18 Ft. Belvoir, VA 22060

19

20 \*Corresponding author:

21 Travis J. Bourret

22 Department of Medical Microbiology and Immunology

23 Creighton University

24 2500 California Plaza

25 Omaha, NE 68178

26 Phone: (402) 280-3750

27 FAX: (402) 280-1875

28 E-mail: [TravisBourret@creighton.edu](mailto:TravisBourret@creighton.edu)

29

30

31 **KEY WORDS**

32 *Borrelia*, Lyme disease, stringent response, gene expression, DnaK Suppressor Protein, DksA

33

## 34 ABSTRACT

35 The pathogenic spirochete *Borrelia burgdorferi* senses and responds to diverse environmental  
36 challenges, including changes in nutrient availability, throughout its enzootic cycle in *Ixodes*  
37 spp. ticks and vertebrate hosts. This study examined the role of DnaK suppressor protein (DksA)  
38 in the transcriptional response of *B. burgdorferi* to starvation. Wild-type and *dksA* mutant *B.*  
39 *burgdorferi* strains were subjected to starvation by shifting mid-logarithmic phase cultures  
40 grown in BSK II medium to serum-free RPMI medium for 6 h under microaerobic conditions (5%  
41 CO<sub>2</sub>, 3% O<sub>2</sub>). Microarray analyses of wild-type *B. burgdorferi* revealed that genes encoding  
42 flagellar components, ribosomal proteins, and DNA replication machinery were downregulated  
43 in response to starvation. DksA mediated transcriptomic responses to starvation in *B.*  
44 *burgdorferi* as the *dksA*-deficient strain differentially expressed only 47 genes in response to  
45 starvation compared to the 500 genes differentially expressed in wild-type strains. Consistent  
46 with a role for DksA in the starvation response of *B. burgdorferi*, fewer CFUs were observed for  
47 *dksA* mutant after prolonged starvation in RPMI medium compared to wild-type *B. burgdorferi*.  
48 Transcriptomic analyses revealed a partial overlap between the DksA regulon and the regulon  
49 of Rel<sub>Bbu</sub>, the guanosine tetraphosphate and guanosine pentaphosphate [(p)ppGpp] synthetase  
50 that controls the stringent response; the DksA regulon also included many plasmid-borne  
51 genes. Additionally, the *dksA* mutant strain exhibited constitutively elevated (p)ppGpp levels  
52 compared to the wild-type strain, implying a regulatory relationship between DksA and  
53 (p)ppGpp. Together, these data indicate that DksA along with (p)ppGpp direct the stringent  
54 response to effect *B. burgdorferi* adaptation to its environment.

## 55 IMPORTANCE

56 The Lyme disease bacterium *Borrelia burgdorferi* must sense and respond to diverse  
57 environments as it cycles between its tick vectors and various vertebrate hosts. *B. burgdorferi*  
58 must withstand prolonged periods of starvation while it resides in unfed *Ixodes* ticks. In this  
59 study, the regulatory protein DksA is shown to play a pivotal role controlling the transcriptional  
60 responses of *B. burgdorferi* to starvation. The results of this study suggest that DksA gene  
61 regulatory activity impacts *B. burgdorferi* metabolism, virulence gene expression, and the ability  
62 of this bacterium to complete its natural life cycle.

## 63 INTRODUCTION

64 The pathogenic spirochete *Borrelia burgdorferi* must sense and respond to its environment to  
65 complete its enzootic cycle (Samuels, 2011; Radolf et al., 2012; Caimano et al., 2016). *Ixodes*  
66 ticks acquire *B. burgdorferi* during a blood meal taken from an infected mammalian host.  
67 Thereafter, *B. burgdorferi* persist in the tick midgut through the molt. A subset of midgut-  
68 localized *B. burgdorferi* are transmitted when the next bloodmeal is acquired by the tick, which  
69 may occur up to ten months after the initial acquisition (Sonenshine, 1991; Gray et al., 2016).  
70 As *Ixodes* ticks progress through their life stages, the dynamic milieu of the midgut presents *B.*  
71 *burgdorferi* with multiple challenges, including variations in osmolarity, pH, temperature,  
72 nutrient availability, as well as oxidative and nitrosative stresses (Sonenshine, 1991; Bontemps-  
73 Gallo et al., 2016; Bourret et al., 2016; Caimano et al., 2016; Dulebohn et al., 2017).

74 *B. burgdorferi* respond to changes in their environment through alterations in replication,  
75 metabolism, and outer surface protein expression (Samuels, 2011; Iyer et al., 2015; Caimano et  
76 al., 2016; Gulia-Nuss et al., 2016; Iyer and Schwartz, 2016). *B. burgdorferi* is a fastidious  
77 organism and an extreme amino acid auxotroph (Fraser et al., 1997; Gherardini et al., 2010;  
78 Groshong et al., 2017). The tick midgut following a molt and prior to a bloodmeal is a nutrient-  
79 limited and challenging growth environment for *B. burgdorferi*. Following a bloodmeal,  
80 nutrients are absorbed and sequestered away from the tick midgut. *B. burgdorferi* responds by  
81 ceasing replication and upregulating genes required to utilize available carbon sources, glycerol  
82 and chitobiose (Tilly et al., 2001; He et al., 2011; Pappas et al., 2011). Expression of genes  
83 encoding tick-associated outer membrane proteins (*ospA* and *lp6.6*) as well as nitrosative and  
84 oxidative defenses (*napA* and *uvrB*) are also required for survival and subsequent transmission  
85 (Li et al., 2007; Promnares et al., 2009; Pappas et al., 2011; Patton et al., 2013; Iyer et al., 2015;  
86 Bourret et al., 2016; Caimano et al., 2016).

87 The stringent response contributes to the ability of bacteria to respond to environments with  
88 limiting in nutrients. During starvation conditions, the stringent response directs resources  
89 away from cellular replication processes, including repression of ribosomal RNA synthesis, while  
90 aligning resources to maintain glycolysis and protein synthesis. The hallmark of this response is  
91 the production of the signaling molecules guanosine pentaphosphate and guanosine  
92 tetraphosphate [(p)ppGpp] from the consumption of cellular ATP and GTP or GDP (Traxler et al.,  
93 2008; Steinchen and Bange, 2016). While the production of (p)ppGpp has many consequences  
94 for the bacterium, the primary outcome is a global shift in transcription by the interaction of  
95 (p)ppGpp with RNA polymerase (Potrykus and Cashel, 2008; Haurlyuk et al., 2015). The  
96 stringent response typically results in reduced DNA replication, translation, and fatty acid  
97 synthesis, as well as increased amino acid synthesis, glycolysis, and persistence-related gene  
98 expression, which together promotes bacterial survival (Gentry et al., 1993; Paul et al., 2005;  
99 Durfee et al., 2008; Traxler et al., 2008). In *B. burgdorferi*, recent studies have shown that  
100 (p)ppGpp plays an important role in controlling expression of genes required for survival within  
101 *I. scapularis* (Bugrysheva et al., 2015; Drecktrah et al., 2015; Drecktrah et al., 2018).

102 *B. burgdorferi* (p)ppGpp synthetase, Rel<sub>Bbu</sub>, is required for the global regulatory effects of  
103 (p)ppGpp (Bugrysheva et al., 2015; Drecktrah et al., 2015). Starvation of *B. burgdorferi* in the  
104 defined culture medium RPMI induces the stringent response and a measurable increase in  
105 (p)ppGpp production (Concepcion and Nelson, 2003; Drecktrah et al., 2015). The transcriptomic  
106 response to cellular starvation provided insights into Rel<sub>Bbu</sub>-mediated regulation. The presence  
107 of (p)ppGpp increases the expression of genes that promote *B. burgdorferi* survival within  
108 *Ixodes* ticks, including glycerol and chitobiose utilization pathways, and *napA*. In addition,  
109 (p)ppGpp represses expression of flagellar, DNA replication, and translation-related genes,  
110 suggesting that control of these genes during starvation conditions *in vivo* is due to the  
111 stringent response. Consistent with these phenotypes, Rel<sub>Bbu</sub> functions in persistence in ticks  
112 and transmission from infected nymphs to mice (Drecktrah et al., 2015).

113 The *B. burgdorferi* stringent response, mediated through (p)ppGpp, plays a key role in survival  
114 within *I. scapularis*; however, the role of DnaK suppressor protein (DksA) has not been

115 investigated. DksA has emerged as an important accessory regulator of stringent responses in  
116 other bacteria (Dalebroux et al., 2010a). In *Escherichia coli*, DksA is specifically required for  
117 upregulation of amino acid biosynthesis, tRNA synthesis, and cellular utilization of alternative  
118 sigma factors (such as RpoS) that integrate the stringent response (Kvint et al., 2000; Brown et  
119 al., 2002; Paul et al., 2005; Magnusson et al., 2007; Bernardo et al., 2009; Lyzen et al., 2016). In  
120 addition, DksA holds a key regulatory role in the life cycle of several bacterial pathogens and is  
121 implicated in virulence gene expression (Dalebroux et al., 2010a; Dalebroux et al., 2010b; Pal et  
122 al., 2012; Holley et al., 2015). In enterohemorrhagic *E. coli*, DksA-dependent regulation is  
123 required for the enterocyte effacement response during intestinal colonization (Nakanishi et al.,  
124 2006; Sharma and Payne, 2006). In *Pseudomonas aeruginosa*, stringent response activation  
125 mediates colonization of surfaces by biofilm formation (Branny et al., 2001). Finally, *Salmonella*  
126 *enterica* requires the stringent response to respond to acidic, oxidative, and nutrient-limited  
127 environments within macrophages (Webb et al., 1999; Henard and Vazquez-Torres, 2012). In  
128 these cases, DksA works synergistically with the stringent response and is indispensable for  
129 adaptation. As seen in other bacteria, *B. burgdorferi* responds to starvation by production of  
130 (p)ppGpp, but the contribution of DksA to the regulation of the stringent response is unknown.

131 In this study, we expand the understanding of the *B. burgdorferi* stringent response by  
132 characterizing the role of a the DksA ortholog during adaptation to nutrient limitation. We  
133 generated a *dksA* mutant strain of *B. burgdorferi* and starved the spirochetes in RPMI medium  
134 to evaluate the role of DksA during the stringent response. Compared to BSK II, RPMI medium  
135 lacks numerous nutrients required for growth of *B. burgdorferi* including serum, oligopeptides,  
136 *N*-acetylglucosamine, along with a lower concentration of glucose. During starvation in RPMI, *B.*  
137 *burgdorferi* cease replication and increase synthesis of (p)ppGpp (Concepcion and Nelson,  
138 2003; Drecktrah et al., 2015). A whole transcriptome analysis using the custom *B. burgdorferi*  
139 Affymetrix microarray chip (Iyer and Schwartz, 2016) was used to examine the response of  
140 wild-type and *dksA* mutant spirochetes to starvation. The following results indicate that  
141 starvation of *B. burgdorferi* in RPMI medium led to a DksA-dependent shift of the global  
142 transcriptome and support designating the *bb0168* gene product as a functional DksA.

## 143 RESULTS

144

### 145 Characterization of a putative DksA encoded by *bb0168*

146 DksA homologs are encoded in many bacterial genera, including *Borrelia*. The structure of DksA  
147 has been extensively characterized in *E. coli* (Blaby-Haas et al., 2011; Ross et al., 2016). Protein  
148 interaction studies have demonstrated that the *E. coli* DksA protein's  $\alpha$ -helices in the coiled-coil  
149 motif interact with the RNA polymerase secondary channel, and that the coiled coil-tip aspartic  
150 acid residues exert DksA function in the RNA polymerase core (Perederina et al., 2004; Lennon  
151 et al., 2012; Furman et al., 2013). In addition, DksA harbors a zinc-finger domain that potentially  
152 modulates its protein function (Henard et al., 2014; Crawford et al., 2016). A SWISS-model was  
153 generated for the 125 amino acid DksA protein encoded by the *B. burgdorferi* *bb0168* ORF using

154 an *E. coli* RNA polymerase / DksA complex crystal structure as a template (Molodtsov et al.,  
155 2018), and visualized alongside the 151 amino acid *E. coli* DksA for comparison (**Figure 1A**). The  
156 *B. burgdorferi* DksA harbors an N-terminal 31 amino acid truncation and is nearly three kDa  
157 smaller than the *E. coli* DksA, 14.5 and 17.5 kDa respectively. The *B. burgdorferi* DksA has only  
158 23.6% amino acid sequence identity to *E. coli* DksA; however, the SWISS-model local quality  
159 estimate indicates high similarity within the coiled-coil motif and the C-terminal region (0.6 to  
160 0.9 quality score). Moreover, an alignment of the *E. coli* and *B. burgdorferi* primary DksA amino  
161 acid sequences using the EMBOSS NEEDLE algorithm demonstrates conservation of key amino  
162 acids in DksA, including the coiled coil-tip aspartic acids in the  $\alpha$ -helices, and the cysteines  
163 forming the zinc-finger motif (**Figure 1B**). Alignment of the amino acid sequences of DksA from  
164 various spirochetes indicates this protein is highly conserved among *Borrelia* species, suggesting  
165 a conserved function (Figure S1).

### 166 **Generation of *B. burgdorferi* $\Delta dksA$ strain and *trans*-complemented $\Delta dksA$ pDksA strain**

167 To study the role of *dksA* in the *B. burgdorferi* stringent response, a *dksA* mutant of *B.*  
168 *burgdorferi* ( $\Delta dksA$ ) was generated in the B31-A3 background. The entire *dksA* (*bb0168*) ORF  
169 was replaced by homologous recombination with a *B. burgdorferi* *flgB* promoter driven  
170 streptomycin resistance cassette (*flgBp-aadA*) used for selection (**Figure 1C**). The *dksA* mutant  
171 strain ( $\Delta dksA$ ) was complemented *in trans* with the shuttle vector pBSV2G (Elias et al., 2003)  
172 containing a *dksA* ORF fused to a sequence encoding a C-terminal FLAG epitope-tag along with  
173 600 base-pairs of *dksA* upstream sequence (pBSV2G::*dksA*-FLAG, pDksA). The presence of the  
174 chromosomal copy of the *dksA* gene was determined by PCR (**Figure 1D**). The expression of  
175 DksA<sub>FLAG</sub> protein in the  $\Delta dksA$  pDksA strain was confirmed by western blot using antibodies  
176 against FLAG and DksA epitopes (**Figure 1E**).

177

### 178 **Adaptation of the $\Delta dksA$ and $\Delta rel_{Bbu}$ mutants to prolonged starvation**

179 *B. burgdorferi* wild-type and  $\Delta dksA$  strains are morphologically similar during logarithmic  
180 growth in BSK II in microaerobic conditions (5% CO<sub>2</sub> and 3% O<sub>2</sub>). Wild-type,  $\Delta dksA$ , and  $\Delta dksA$   
181 pDksA spirochetes maintain similar maximal growth rates during logarithmic growth (**Figure**  
182 **2A**). The  $\Delta dksA$  mutant exhibited a prolonged lag phase and lower cell densities at stationary  
183 phase compared to both wild-type and  $\Delta dksA$  pDksA strains when passaged at equivalent  
184 densities (*p*-value < 0.05). When cultures were inoculated at low densities of 1 x 10<sup>5</sup> spirochetes  
185 ml<sup>-1</sup>, the  $\Delta dksA$  mutants exhibited elongated morphology compared to wild-type at early time  
186 points. (Figure S2).

187 To determine if DksA affects survival during nutrient stress, wild-type,  $\Delta dksA$ ,  $\Delta rel_{Bbu}$ , and  $\Delta dksA$   
188 pDksA spirochetes were cultured to 5 x 10<sup>7</sup> spirochete ml<sup>-1</sup> and then starved in RPMI medium  
189 for 0 or 48 h and the number of colony forming units (CFUs) were assayed by plating cells in  
190 semi-solid BSK II medium. A recent study demonstrated that a *rel<sub>Bbu</sub>* mutant *B. burgdorferi*  
191 ( $\Delta rel_{Bbu}$ ) exhibited defect in adapting to starvation in serum-free RPMI medium (Drecktrah et

192 al., 2015). We generated a  $\Delta rel_{Bbu}$  strain in the B31-A3 background as described (Drecktrah et  
193 al., 2015), and consistent with previous results,  $\Delta rel_{Bbu}$  cultures yielded significantly lower  
194 numbers of CFUs following 48 h of starvation in RPMI, compared to wild-type cultures (**Figure**  
195 **2B**). Following prolonged starvation,  $\Delta dksA$  cultures exhibited a reduction in CFUs similar to  
196  $\Delta rel_{Bbu}$ . The  $\Delta dksA$  pDksA restored CFUs to wild-type levels following starvation, suggesting that  
197 DksA functions in the adaptation of *B. burgdorferi* to starvation.

198

## 199 **Global transcriptome of the *dksA* mutant during logarithmic phase growth**

200 To investigate DksA-dependent transcription during growth in nutrient-rich media, RNA was  
201 harvested from wild-type and  $\Delta dksA$  mutant cultures grown to mid-logarithmic growth phase  
202 and analyzed by microarray. For these comparisons, genes were considered expressed if the  
203 hybridization signal for an ORF was significantly above background (**Figure 3A**). To evaluate  
204 differential expression, we constrained the reporting of genes to only the genes differentially  
205 expressed by two-fold (linear scale) or more, and disregarded genes when normalized, average  
206 hybridization signals were below background levels or when microarray false discovery rate  
207 (FDR)-adjusted *p*-values were 0.05 or more. The differentially regulated genes were then  
208 categorized by genomic location (chromosome or plasmid, **Figure 3B**) and function based on  
209 gene ontology (**Figure 3C**) to gain insights into DksA-dependent gene expression during  
210 logarithmic phase growth.

211

212 During mid-logarithmic phase growth, the  $\Delta dksA$  mutant exhibited an altered transcriptional  
213 profile compared to wild-type spirochetes, suggesting DksA is important for gene regulation  
214 during growth. The  $\Delta dksA$  mutant expressed 1212 genes compared to 1145 genes in the wild-  
215 type (**Figure 3A**) located across the chromosome and numerous circular and linear plasmids  
216 (**Figure 3A and 3B**). The differential regulation analysis revealed that 268 genes were highly  
217 expressed in the  $\Delta dksA$  mutant compared to the wild-type-strain (Table S1), while 186  
218 transcripts were expressed at lower levels by the  $\Delta dksA$  mutant (Table S2). Because both  $\Delta dksA$   
219 or  $\Delta rel_{Bbu}$  mutants are susceptible to the starvation condition in RPMI, we assessed the overlap  
220 of the putative DksA and Rel<sub>Bbu</sub> regulon by matching genes similarly regulated by either  $\Delta dksA$   
221 or  $\Delta rel_{Bbu}$ . Overlap with two previous transcriptomic studies identifying genes differentially  
222 regulated in  $\Delta rel_{Bbu}$  indicate up to 115 genes are cooperatively regulated by DksA and Rel<sub>Bbu</sub>  
223 (Table S1 and S2). The genes encoding glycerol utilization proteins *glpF* and *glpK*, and  
224 oligopeptide transporters *oppA1* and *oppA2*, were similarly down regulated in the  $\Delta dksA$  and  
225  $\Delta rel_{Bbu}$  mutants compared to the wild-type. The expression of genes encoding tick-associated  
226 outer membrane proteins *ospA* and *lp6.6*, and the antioxidant defense gene *napA* were also  
227 similarly regulated in the  $\Delta rel_{Bbu}$  strain. The  $\Delta dksA$  mutant additionally expressed genes  
228 associated with stress responses at higher levels than the wild-type strain (Table S1), including  
229 those encoding chaperones (*dnaK* and *dnaJ*), DNA repair proteins (*ligA* and *uvrB*) and numerous  
230 bacteriophage genes (*bbl01*, *bbn23*). In addition, the  $\Delta dksA$  strain and  $\Delta rel_{Bbu}$  strains both  
231 exhibit increased expression of selected genes encoding ribosomal proteins (*rpmA*, *rplB*, *rplV*,

232 *rpsS*, *rpsC*) suggesting both (p)ppGpp and DksA are required to suppress these genes. These  
233 results are suggestive of partially overlapping regulons between Rel<sub>Bbu</sub> and DksA.

234

235 To validate the microarray findings, RT-qPCR was performed comparing wild-type and  $\Delta dksA$   
236 spirochetes during logarithmic phase growth (**Figure 3D & E**). RT-qPCR confirmed relative  
237 expression of genes that produced high microarray signal quality (*oppB1* and *ptsP*), are  
238 implicated in the stringent response (*rel<sub>Bbu</sub>*, *glpF*, and *glpK*), have housekeeping functions (*rplL*,  
239 *rpoD*, and *flaB*), or are required for infectivity (*dbpA*, *bba66*, and *ospC*). Many of these genes  
240 (*rplL*, *rpoD*, *fliZ*, *flaB*, *bb0332*, and *ptsP*) are highly expressed genes with nearly 100 transcripts  
241 per 1,000 transcripts of 16S rRNA during logarithmic phase growth. Transcriptional studies have  
242 indicated that the glycerol utilization pathway is a key metabolic pathway regulated by the  
243 stringent response (Bugrysheva et al., 2015; Drecktrah et al., 2015). Two genes, *glpF* and *glpK*,  
244 encoding the glycerol transporter and kinase, respectively, were expressed at lower levels in  
245 the  $\Delta dksA$  mutant compared to wild-type, indicating an overlap in the regulation of the glycerol  
246 utilization pathway (Table S2). Eleven of the 12 genes assayed exhibited the same direction and  
247 similar magnitude of relative expression in the RT-qPCR and microarray results. These data  
248 corroborate the findings of our microarray experiments and indicate a global effect of DksA on  
249 transcription.

250

## 251 **DksA mediates transcriptional responses to starvation**

252 DksA orthologs regulate transcription in model bacteria. Therefore, we evaluated the role of  
253 DksA in the *B. burgdorferi* stringent response by comparing differences of the transcriptional  
254 responses of wild-type and  $\Delta dksA$  strains to starvation in RPMI. For microarray analysis, RNA  
255 was harvested from cultures grown to mid-logarithmic growth phase and then following 6 h of  
256 incubation in serum-free RPMI. In wild-type spirochetes undergoing starvation, there was a  
257 dramatic reduction in the number of genes exhibiting above background microarray  
258 hybridization signals. While 1,145 genes were expressed in wild-type spirochetes during  
259 logarithmic growth in BSK II, only 587 genes were detected in wild-type spirochetes following  
260 starvation in RPMI, revealing a global reduction in transcription (**Figure 4A**). A total of 274  
261 genes were upregulated and 226 genes were downregulated in response to starvation,  
262 indicating a restructuring of the wild-type transcriptome (Table S3), consistent with previous  
263 results obtained using differential RNA sequencing analysis (Drecktrah et al., 2015). In contrast,  
264 the  $\Delta dksA$  mutant undergoing starvation retained the expression of the majority of genes  
265 expressed during logarithmic growth in BSK II (**Figure 4B**). Within this sizable subset of genes  
266 expressed in the  $\Delta dksA$  mutant, only 47 genes were differentially regulated (Table S4). Thus,  
267 transcriptional remodeling of the genome during nutrient stress is to a great extent dependent  
268 on DksA.

269

270 Genes differentially expressed by wild-type spirochetes undergoing starvation treatment were  
271 organized by gene location and functional category to characterize the transcriptional response.  
272 In wild-type spirochetes, transcriptional downregulation in response to starvation is mostly  
273 limited to chromosomally-encoded genes (**Figure 4C**). 213 of the total 226 downregulated  
274 genes were on the chromosome. Downregulated chromosomal genes are overrepresented in  
275 four functional categories: chemotaxis, DNA replication and repair, transcription (and  
276 transcriptional regulation), and translation. Among the chemotaxis genes, 13 of the 17  
277 downregulated genes encoded flagellar components (Table S3). Genes encoding DNA  
278 replication proteins were also downregulated, including *gyrA* and *gyrB* (3.4- and 2.4-fold  
279 respectively) encoding DNA gyrase, *dnaB* (3.2-fold) encoding the replicative DNA helicase, and  
280 *dnaN* (5.2-fold) encoding the  $\beta$ -clamp of the DNA polymerase. The reduction in expression of  
281 DNA replication and flagellar synthesis genes is consistent with the observation that *B.*  
282 *burgdorferi* do not increase in CFU during starvation conditions. Additionally, we identified 39  
283 downregulated genes encoding translation machinery including 19 genes encoding ribosomal  
284 proteins, suggesting a reduction in ribosome synthesis. A total of 17 genes in the transcription  
285 functional category were also differentially regulated during starvation. Genes encoding core  
286 transcriptional machinery were among the 11 downregulated genes, including *rpoA* and *rpoZ*  
287 (6.2-fold and 3.5-fold, respectively) encoding RNA polymerase subunits, *rpoD* (3.7-fold)  
288 encoding the housekeeping sigma factor, and *nusB* (7.6-fold) encoding the transcription anti-  
289 termination factor. Conversely, *csrA* (6.8-fold) encoding the the carbon storage regulator, *dksA*  
290 (4.4-fold), and *rpoS* (3.8-fold) encoding the alternative sigma factor were among the  
291 upregulated transcriptional regulator genes. In summary, levels of a large portion of RNA  
292 transcripts encoding crucial components of replication, transcription, and translation were  
293 decreased in wild-type spirochetes undergoing starvation. Given the functions encoded by  
294 these downregulated genes, our observations are consistent with stringent responses among  
295 bacteria. None of the genes in these four functional categories listed above were differentially  
296 regulated in the  $\Delta dksA$  mutant, therefore the down regulation of these genes during starvation  
297 appears DksA-dependent (**Figure 4D**).

298 Typically, the stringent response activates the expression of genes encoding enzymes for amino  
299 acid synthesis, glycolysis, and persistence mechanisms. Consistent with the stringent response,  
300 *B. burgdorferi* undergoing starvation also upregulate genes in the functional categories of  
301 translation, metabolism, and transcription. Expression of genes that potentially increase  
302 translational efficiency were upregulated (Table S3). These genes include *infA* (4.75-fold)  
303 encoding translation initiation factor, *efp* (2.8-fold) and *tuf* (5.0-fold) encoding peptide  
304 elongation factors, and five aminoacyl-tRNA synthetases required for synthesis of Asp-tRNA<sup>asp</sup>,  
305 His-tRNA<sup>His</sup>, Ile-tRNA<sup>Ile</sup>, Leu-tRNA<sup>Leu</sup>, Val-tRNA<sup>Val</sup>, which recognize 33% of codons utilized by *B.*  
306 *burgdorferi* open reading frames (Lafay et al., 1999). The *B. burgdorferi* genome lacks many  
307 genes encoding for amino acid biosynthesis pathways and imports oligopeptides into the cell  
308 through transporters to support protein synthesis. Four oligopeptide transporter genes were  
309 upregulated; *oppA5* (6.2-fold), *oppF* (5.8-fold), *oppD* (2.5-fold), and *oppB* (2.5-fold). The  
310 transcriptome of genes involved in translation and oligopeptide transport in the  $\Delta dksA$  mutant  
311 did not overlap that exhibited by wild-type spirochetes during starvation. Additionally, wild-  
312 type spirochetes upregulated five genes encoding enzymes involved in glycolysis during



313 starvation: *pfk* (2.4-fold) encoding 1-phosphofructokinase, *fbaA* (2.1-fold) encoding fructose-  
314 bisphosphate aldolase, *gapdh* (5.1-fold) encoding glyceraldehyde 3-phosphate dehydrogenase,  
315 *gmpA* (5.5-fold) encoding phosphoglycerate mutase, and *eno* (5.7-fold) encoding enolase. *B.*  
316 *burgdorferi* lacks an electron transport chain and ferments sugars to lactate for generation of  
317 ATP. During starvation of wild-type spirochetes, no genes encoding enzymes involved in  
318 glycolysis or transporters for glucose, fructose, and chitobiose were down regulated. In  
319 contrast, the  $\Delta dksA$  strain exhibited lower transcript levels of genes encoding key glycolysis  
320 genes enolase *eno* and pyruvate kinase *pyk* during logarithmic growth and the  $\Delta dksA$  strain did  
321 not share the breadth of upregulation in genes encoding glycolysis enzymes in response to  
322 starvation compared to wild-type spirochetes.

323

### 324 **Increased expression of plasmid encoded genes in response to starvation conditions**

325 Wild-type spirochetes undergoing starvation also differentially expressed genes carried on the  
326 numerous circular and linear plasmids (**Figure 4C**). Differentially expressed genes were largely  
327 limited to those encoding lipoproteins and hypothetical proteins, with 91% of those genes  
328 upregulated. These upregulated genes include those encoding nine OspE related proteins (*erp*)  
329 and eight multi-copy lipoproteins (*mlp*) carried on cp32s, with 3.1- to 9.8-fold and 4.8- to 13.1-  
330 fold upregulation, respectively (Table S3). In addition, *revA* (6.4-fold) and *bbk32* (2.6-fold),  
331 encoding fibronectin binding proteins, were also upregulated. Specifically, the gene product of  
332 *bbk32* regulates the classical pathway of complement and is important for infection (Lin et al.,  
333 2015; Garcia et al., 2016). The biological significance of lipoprotein regulation during starvation  
334 in RPMI medium is unknown. Overall protein expression and the level of immunogenic protein  
335 expression by wild-type and  $\Delta dksA$  spirochetes remain relatively constant following 6 h of  
336 incubation in RPMI (Figure S3). Starvation is not thought to induce the mammalian-infection  
337 associated RpoN-RpoS cascade (Burtnick et al., 2007; Caimano et al., 2007; Samuels, 2011) and,  
338 as expected, transcription of the RpoS-regulated genes *dbpA* and *ospC* was not upregulated in  
339 response to nutrient limitation in wild-type spirochetes.

340 Compared to the wild-type strain, the  $\Delta dksA$  mutant upregulated the expression of *revA*, *dbpA*,  
341 and *ospC* genes in response to starvation (Table S4). The  $\Delta dksA$  mutant did not share the  
342 increased expression of *erp* or *mlp* genes with the wild-type strain during starvation. We  
343 investigated the possibility that these genes were constitutively upregulated in the  $\Delta dksA$   
344 mutant because the expression of many plasmid genes was higher compared to the wild-type  
345 strains during logarithmic growth (**Figure 3B**). A total of 41 plasmid-borne lipoproteins encoding  
346 genes were differentially expressed by the  $\Delta dksA$  mutant during logarithmic growth (Figure S1  
347 and S2). However, *revA*, *bbk32*, *erp*, and *mlp* genes had no clear pattern of constitutively higher  
348 expression by the  $\Delta dksA$ . Moreover, we found genes encoding lipoproteins under the control of  
349 RpoS regulation, and important for *B. burgdorferi* transmission, such as *bba66* (5.8-fold), *dbpA*  
350 (8.6-fold), and *ospC* (22.0-fold) were expressed at lower levels by the  $\Delta dksA$  mutant during  
351 logarithmic growth. Previously, the Rel<sub>Bbu</sub> too appeared to control genes of the same pathway  
352 of activation: *rpoS*, *bosR* and *ospC* (Drecktrah et al., 2015). These results suggest DksA and the

353 stringent response are required for the regulation of specific transmission associates  
354 lipoprotein genes.

355 To confirm that the disparate expression of *bba66*, *dbpA*, and *ospC* was DksA-dependent, the  
356 expression of these genes was compared by RT-qPCR using RNA isolated from the wild-type,  
357  $\Delta dksA$ , and  $\Delta dksA$  pDksA strains during logarithmic growth and under starvation conditions  
358 (**Figure 5**). In our complemented strain,  $\Delta dksA$  pDksA, *dksA* was over expressed, which  
359 coincided with higher levels of expression of the *bba66*, *dbpA*, and *ospC*. This observation  
360 supports the hypothesis that the expression of a subset of plasmid-encoded lipoproteins is  
361 either directly or indirectly dependent on DksA. Higher levels of *dksA* expression from the  
362 pDksA vector is consistent with a previous report that this plasmid vector is multi-copy (5 – 10  
363 copies) within the cell (Tilly et al., 2006). Additionally, RT-qPCR was performed for *rpoD*, *fliZ*,  
364 and *ptsP* to evaluate the effects of *trans*-complementation in the  $\Delta dksA$  pDksA strain. In the  
365 wild-type and in the  $\Delta dksA$  pDksA strain, *rpoD*, *fliZ*, and *ptsP* are down regulated in response to  
366 starvation, while the  $\Delta dksA$  mutant failed to similarly regulate these genes (Figure S4A). RT-  
367 qPCR indicated that starvation driven transcriptional regulation of these chromosomally  
368 encoded genes was restored in the  $\Delta dksA$  pDksA strain. We also assayed for the restoration of  
369 glycerol-utilization gene expression (Figure S4B). While the  $\Delta dksA$  mutant showed reduced  
370 levels of expression of *glpF* and *glpK* compared to the wild-type strain, the  $\Delta dksA$  pDksA strain  
371 did not exhibit restored expression of these genes, suggesting potential intricacies in their  
372 regulation not captured by this study. These results suggest that the cellular levels of DksA have  
373 the potential to play a key regulatory role in controlling plasmid-borne gene expression in *B.*  
374 *burgdorferi*.

375

### 376 **The $\Delta dksA$ strain overproduces (p)ppGpp**

377 Production of (p)ppGpp and transcriptional regulation of *dksA* are intertwined in *E. coli* and  
378 (p)ppGpp also acts independently of DksA, resulting in transcriptional repression (Chandrangsu  
379 et al., 2011; Ross et al., 2016). To examine the potential interplay between (p)ppGpp by DksA,  
380 we measured the production of (p)ppGpp by thin-layer chromatography (TLC) in *B. burgdorferi*  
381 297 wild-type, and the isogenic  $\Delta dksA$  strain, along with the complemented  $\Delta dksA$  pDksA strain.  
382 These 297 strains exhibit morphology, growth rate, and survival phenotypes similar to those of  
383 the respective *B. burgdorferi* B31 A3 strains (**Figure 2 and 6**). Strains were cultured to late-log ( $1$   
384  $\times 10^8$  spirochetes  $\text{ml}^{-1}$ ) in BSK II containing  $^{32}\text{P}$ -orthophosphate and nucleotides were isolated  
385 before (0 hours) or after incubation in starvation conditions (6 h) and separated by thin layer  
386 chromatography. The amount of (p)ppGpp in each strain was quantified by scanning  
387 densitometry from three independent experiments, as previously described (**Figure 7A**)  
388 (Drecktrah et al., 2015). We found the  $\Delta dksA$  strain had significantly elevated levels of (p)ppGpp  
389 compared to the wild-type and complemented strains not only during starvation (6 Hours  
390 RPMI), but also during growth in BSK II media (0 h) (**Figure 7B**). Overproduction of (p)ppGpp in  
391 the  $\Delta dksA$  strain may represent a compensatory mechanism to overcome the loss of DksA.  
392 Given the 500 genes differentially regulated by wild-type spirochetes in response to starvation

393 (Table S3), 186 of these genes were already similarly differentially expressed by the  $\Delta dksA$   
394 strain relative to the wild-type strain during logarithmic growth. The microarray data suggest  
395 that while the  $\Delta dksA$  strain acts like a (p)ppGpp-deficient strain in transcription of genes  
396 encoding glycerol utilization genes, oligopeptide transporters, and ribosomal proteins, and  
397 others, the elevated levels of (p)ppGpp may play a role in the overall phenotype of the  
398 transcriptome in the  $\Delta dksA$  strain.

399

## 400 DISCUSSION

401 We report that the *B. burgdorferi* genome encodes a 14.5 kDa DksA protein that is involved in  
402 the transcriptional response to nutrient limitation and likely plays an additional role in  
403 controlling expression of plasmid-encoded genes. The stringent response, mediated through  
404 (p)ppGpp, is required for *B. burgdorferi* to adapt to the changes between the host and vector  
405 environments marking a shift in nutrient sources (Drecktrah et al., 2015). Therefore, we set out  
406 to characterize the role of DksA as a transcriptional regulator of the *B. burgdorferi* stringent  
407 response by simulating transition from a nutrient rich to a nutrient limited environment. Our  
408 microarray results determined that transcript levels of 500 genes changed in response to  
409 nutrient limitation (Table S3). The majority of transcriptional changes were DksA-dependent,  
410 with the expression of only 47 genes being DksA-independent under the nutrient limiting  
411 condition (Table S4). During mid-logarithmic growth, we found transcript levels of genes  
412 encoding ribosomal proteins (*rpmA*, *rplB*, *rplV*, *rpsS*, and *rpsC*) and stress response genes (*dnaK*,  
413 *dnaJ*, and *uvrB*) to be elevated in the  $\Delta dksA$  strain, and the regulation of 41 plasmid-borne  
414 lipoprotein genes to be DksA-dependent (Table S1 and S1). The transcript levels of lipoprotein  
415 genes *bba66*, *dbpA*, and *ospC* were independently confirmed to be DksA-dependent in  
416 expression in 297 and A3 background strains (**Figure 5 and 6**), suggesting a pivotal role of DksA  
417 in expression of these genes. Moreover, the effects of a *dksA* deletion are likely not polar as  
418 complementation of the  $\Delta dksA$  strain with a plasmid encoding a FLAG epitope-tagged DksA led  
419 to rescue of the  $\Delta dksA$  phenotypes. The expression of subsets of outer surface lipoproteins in  
420 either ticks or mammals are thought to aid in the transmission and infectivity of *B. burgdorferi*.  
421 This transcriptional study provides additional evidence that the stringent response may play a  
422 role in control of outer surface lipoproteins.

423 Our microarray analyses suggest a partial overlap between the DksA and the (p)ppGpp regulons  
424 of *B. burgdorferi*. This is supported by the fact that the  $\Delta rel_{Bbu}$  and  $\Delta dksA$  mutants overlap in the  
425 lower levels of expression of oligopeptide transporters *oppA1* and *oppA2* and glycerol  
426 utilization genes *glpF* and *glpK*, while (p)ppGpp may independently regulate the glycerol  
427 utilization gene *glpD* (Bugrysheva et al., 2015; Drecktrah et al., 2015) (Table S2). The expression  
428 of the genes *ospA* and *lp6.6*, encoding tick-associated outer membrane proteins, and *napA*, an  
429 antioxidant defense gene, were reduced in  $\Delta dksA$  mutants, suggesting the regulation of each of  
430 these requires the cooperation of DksA and (p)ppGpp. In addition, the  $\Delta dksA$  and  $\Delta rel_{Bbu}$   
431 mutants both display poor adaptation to starvation since CFUs during prolonged starvation in  
432 RPMI were reduced. Wild-type spirochetes reduce transcription of replication, flagellar

433 synthesis, and core ribosomal genes in response to starvation in RPMI medium and at the same  
434 time, upregulate genes required for peptide synthesis and glycolysis. A possible explanation for  
435 the poor adaptation to starvation by  $\Delta dksA$  and  $\Delta rel_{Bbu}$  mutants is the inability of the mutant  
436 strains to reduce transcription of growth- and motility- related genes to remain viable. The  
437 activity of both DksA and (p)ppGpp are likely needed for a proper response to starvation. In *E.*  
438 *coli*, DksA-dependent and (p)ppGpp-dependent regulation overlap to coordinate starvation-  
439 induced bacterial stringent response (Paul et al., 2004; Magnusson et al., 2007; Aberg et al.,  
440 2009; Lemke et al., 2009; Furman et al., 2015; Ross et al., 2016).

441 The two regulators DksA and (p)ppGpp have a close regulatory relationship in *B. burgdorferi*.  
442 Two recent transcriptional studies of *B. burgdorferi* have demonstrated that  $\Delta rel_{Bbu}$  mutants  
443 overexpress *dksA*, suggesting that production of (p)ppGpp represses *dksA* (Bugrysheva et al.,  
444 2015; Drecktrah et al., 2015). While the role of *dksA* upregulation in  $\Delta rel_{Bbu}$  spirochetes is  
445 unclear, we now demonstrate DksA plays a major role in transcriptional control of gene  
446 expression in *B. burgdorferi*. The transcriptomic data indicated the  $\Delta dksA$  mutant exhibited  
447 expanded gene expression of select genes during mid-logarithmic growth and was unable to  
448 remodel the transcriptome during starvation. While the mechanism by which DksA imposes  
449 selectivity on gene transcription in *B. burgdorferi* remains to be explored, we additionally found  
450 DksA affects (p)ppGpp levels in this organism (**Figure 7**). Levels of (p)ppGpp produced in the  
451 absence of DksA were higher than levels reached by wild-type cells *in vitro* by simulating a  
452 nutrient limited condition. Moreover,  $\Delta dksA$  spirochetes produced these levels of (p)ppGpp  
453 prior to incubation in RPMI medium, suggesting alteration of  $Rel_{Bbu}$  activity in the absence of  
454 DksA. We propose the stringent response in *B. burgdorferi* likely requires both DksA and  
455 (p)ppGpp (**Figure 8**).

456 The DksA-dependent stringent response regulon potentially intersects with other regulatory  
457 mechanisms. Since (p)ppGpp is over-produced in the  $\Delta dksA$  mutant, we cannot differentiate  
458 between the effects of (p)ppGpp from DksA-dependent regulation. (p)ppGpp is known to act  
459 independent of transcription by interacting with GTPases and riboswitches (Steinchen and  
460 Bange, 2016; Sherlock et al., 2018). Additionally, ATP and GTP homeostasis is likely altered by  
461 consumption of these nucleotide triphosphates when (p)ppGpp is produced to high levels in the  
462  $\Delta dksA$  mutant. All of the genes encoding xanthine/guanine permease, ribose/galactose ABC  
463 transporter, and adenine deaminases were also up regulated in the  $\Delta dksA$  mutant (Table S1),  
464 potentially altering the flux of ATP or GTP pools. The genes encoding transmission-associated  
465 lipoproteins *cspZ*, *ospD*, *mlpD*, and *ospE* had higher expression within the  $\Delta dksA$  mutant, the  
466 expression of which are known to be controlled by cyclic di-GMP produced by Rrp1 (Rogers et  
467 al., 2009; Caimano et al., 2015). The regulation of cyclic-di-GMP synthesis may be altered in the  
468  $\Delta dksA$  mutant. Additionally, transcription of the infectivity-associated lipoproteins *ospC* and  
469 *dbpA* were decreased in the  $\Delta dksA$  mutant. The *ospC* and *dbpA* genes are regulated through a  
470 complex regulatory cascade involving Rrp2, RpoN, and RpoS (Burtnick et al., 2007; Boardman et  
471 al., 2008; Ouyang et al., 2008). As production of (p)ppGpp alters homeostasis of phosphates in  
472 bacteria (Rao et al., 1998; Haurlyliuk et al., 2015), a potential point of regulatory interplay is  
473 Rrp2 (Boardman et al., 2008; Samuels, 2011). The regulation of Rrp2 phosphorylation is  
474 currently unknown, but the alteration of levels of phosphorylation in metabolic intermediates

475 or in adenosine nucleotides may impact Rrp2 phosphorylation (Richards et al., 2015). It is  
476 possible that regulators sensitive to phosphate and nucleotide homeostasis in *B. burgdorferi*  
477 greatly contribute to the phenotype exhibited by the  $\Delta dksA$  mutant.

478 In summary, we found that the *B. burgdorferi* genome encodes a DksA which contains  
479 conserved amino acid residues in the coiled-coil tip and in the zinc-finger important for DksA  
480 function in *E. coli* and *Salmonella*. Data presented here support the hypothesis that DksA is a  
481 functional transcriptional regulator in *B. burgdorferi*. We demonstrated *dksA*-dependent  
482 phenotypes in two strains of *B. burgdorferi*, B31-A3 and 297. The  $\Delta dksA$  mutants in both B31-A3  
483 and 297 background strains exhibit a long-term survival defect in RPMI and constitutively  
484 increased expression of housekeeping genes such as *flaB* and *rpoD*. Finally, the DksA-dependent  
485 global transcriptional changes reported here suggests DksA is fundamental for *B. burgdorferi* to  
486 adapt to environmental challenges invoking the stringent response.

## 487 MATERIALS AND METHODS

### 488 Bacterial strain and growth conditions

489 Low-passage *B. burgdorferi* B31-A3 (Elias et al., 2002) and 297 (Hughes et al., 1992) strains and  
490 their respective *dksA* and *rel<sub>Bbu</sub>* mutants, and *trans*-complemented  $\Delta dksA$  pDksA strains  
491 generated for this study were cultured in BSK II medium at pH 7.6 under microaerobic  
492 conditions (5% CO<sub>2</sub>, 3% O<sub>2</sub>) at 34 °C. BSK II media were inoculated at  $1 \times 10^6$  spirochetes ml<sup>-1</sup>  
493 and grown to mid logarithmic phase ( $3 - 5 \times 10^7$  spirochetes ml<sup>-1</sup>) density. Spirochete densities  
494 were determined by dark field microscopy, with eight microscopy fields counted per time point,  
495 and four biological replicates. Cultures from frozen stocks were passaged two times before  
496 performing assays. Construction of mutant strains is described in Supplementary Materials. The  
497 mutant strains and their plasmid profiles were determined by PCR analysis as described  
498 previously (Bunikis et al., 2011; Xiang et al., 2017) (Table S5).

499

### 500 Incubation of spirochetes in RPMI

501 Incubation of spirochetes in RPMI and growth in semi-solid BSK II medium were performed  
502 under microaerobic conditions (5% CO<sub>2</sub>, 3% O<sub>2</sub>, 34 °C). Mid-logarithmic growth cultures were  
503 pelleted by centrifugation at  $3,200 \times g$  for 20 min at room temperature. The BSK II supernatant  
504 was discarded, and the pellet was resuspended in the original volume of RPMI 1640 with 2.0  
505 mM L-glutamine (Sigma-Aldrich, St. Louis, MO, United States). The spirochetes were incubated  
506 for 6 h to compare transcription between strains or for 0 to 48 h to compare survival following  
507 long-term incubation. For quantification of viable spirochetes, *B. burgdorferi* were plated in 25  
508 ml semi-solid BSK II medium as previously described (Samuels et al., 2018), after culture density  
509 was reduced by serial dilutions in BSK II medium.

510

## 511 RNA extraction

512 Total RNA was extracted from 14 ml cultures at  $5 \times 10^7$  spirochetes ml<sup>-1</sup> density in BSK II or  
513 RPMI. *B. burgdorferi* cells were pelleted by centrifugation at 4 °C, 3,200 x *g* for 17 min. Pellets  
514 were washed once in HN buffer (10 mM HEPES, 10 mM NaCl, pH 8.0) and then dissolved in 1 ml  
515 of RNazol (Sigma-Aldrich, St. Louis, MO, United States) for RNA isolation according to the kit  
516 protocol. RNA integrity was confirmed by evaluation of ribosomal RNA following gel  
517 electrophoresis. The RNA was quantified by TAKE3 plate spectrophotometry in a Cytation 5  
518 multi-mode plate reader (Biotek, Winooski, VT, USA).

519

## 520 RT-qPCR analysis

521 cDNA synthesis was performed with approximately 1 µg of RNA with the RNA High-Capacity  
522 cDNA Reverse Transcription kit (Applied Biosystems, Foster City, CA, United States). The qPCR  
523 amplification was performed in Bullseye EvaGreen Master Mix (MIDSCI, Valley Park, MO, United  
524 States) using oligonucleotide primers specific to the gene of interest (Table S5) and detected by  
525 CFX Connect Real-Time PCR Detection System (Bio-Rad, Hercules, CA, United States). All Cq  
526 values were calculated by the CFX regression method. The Cq values of raw RNA inputs into the  
527 cDNA reaction (minus RT control) ensured that samples were DNA-free. 16S rRNA transcript  
528 levels were utilized as the reference. Typically, rRNA levels are significantly reduced during the  
529 stringent response, however, the Cq values of 16S rRNA were less responsive to varying  
530 conditions than other common reference genes such as *flaB* and *rpoD* (Figure S4). The RT-qPCR  
531 data were analyzed in Excel (Microsoft, Redmond, WA, United States) using the  $\Delta Cq$  method to  
532 represent transcript levels relative to 16S rRNA. Graphing and statistical comparisons were  
533 performed with Prism (GraphPad software, La Jolla, CA, United States).

534

## 535 Microarray Analysis

536 Fragmented biotin-dUTP-labeled cDNA was prepared from purified RNA by following the  
537 Affymetrix prokaryotic target preparation protocol (Affymetrix, Santa Clara, CA, United States).  
538 The cDNA was hybridized to an Affymetrix-based Rocky Mountain Lab Custom Chip 1. Each  
539 Affymetrix chip contains three intra-chip locations for 16 antisense perfect match and  
540 mismatch probe sets against each of the 1323 ORFs of the *B. burgdorferi* strain B31 genome.  
541 One chip was used to assay for the transcriptome per biological sample. Initial quality analysis  
542 was performed on the Affymetrix Command Console version 3.1 and hybridization signals were  
543 normalized by the Affymetrix expression console version 1.1.2800 using scaling based on  
544 average cell intensity. Signal intensity principle components analysis was performed Partek  
545 Genomics Suite software v6.6 6.13.213 (Partek, Inc. St. Louis, Mo., United States) verifying that  
546 variability among biological replicates remained small compared to variability between strains  
547 and conditions. An ANOVA was performed within Partek Genomic Suite to obtain multiple test

548 corrected *p*-values using the false discovery rate method (Benjamini et al., 2001). Fold change  
549 values and signal confidence were calculated in custom Excel templates. Importantly, our  $\Delta dksA$   
550 strain lacked lp-5, 21, 25, and 28-4 plasmids and the chip hybridization locations for these  
551 plasmids were excluded from the analysis.

552 The number of genes regulated in genomic locations or in functional categories was quantified  
553 using filters coded in RStudio (Boston, MA, United States). Affymetrix probe sets representing  
554 the gene comparisons with above background signal, ANOVA value ( $p < 0.05$ ), and relative  
555 expression difference of two-fold or more were selected for representation. The number of  
556 genes that passed the criteria were totaled for each genomic segment, or alternatively, each  
557 higher or lower expressed gene was categorized by gene ontology as previously described  
558 (Bugrysheva et al., 2015; Drecktrah et al., 2015). The total gene numbers were visualized with  
559 Prism (GraphPad software, La Jolla, CA, United States).

560

#### 561 **SDS-PAGE and immunoblot**

562 Total cell lysates were prepared from 45 ml cultures. Spirochetes were pelleted at 4 °C, 3,200 x  
563 *g* for 17 min. Spirochetes were washed twice with HN buffer (10 mM HEPES, 10 mM NaCl, pH  
564 8.0) and subsequently lysed in lysis buffer (4% SDS, 0.1 M Tris-HCl, pH 8.0). The lysate loading  
565 was equalized to 4 µg per sample, roughly  $5 \times 10^7$  spirochetes, by BCA assay (Thermo Fisher  
566 Scientific, Grand Island, NY, United States). SDS-PAGE was performed on the Mini-Tetra System  
567 (Bio-Rad, Hercules, CA, United States). Proteins were detected using the EZstain system on the  
568 Gel Doc EZ imager (Bio-Rad, Hercules, CA, United States). Protein was transferred to PVDF  
569 membrane with the Transblot Turbo system (Bio-Rad, Hercules, CA, United States). The  
570 DYKDDDDK(FLAG)-tag monoclonal mouse antibody, 1 µg ml<sup>-1</sup>, (Thermo Fisher Scientific, Grand  
571 Island, NY, United States) was diluted 1:2000 in TBST for blotting for recombinant protein  
572 detection. Rabbit anti-DksA antibody was diluted at 1:2000 in TBST for DksA protein detection  
573 (Genscript, Piscataway, NJ, United States). Mouse serum from B31-A3 infected mice were  
574 diluted 1:200 for immunogenic protein blotting. The antibody binding was detected with the  
575 addition of HRP-conjugated secondary antibody and subsequent imaging using ECL  
576 chemiluminescence substrate (LI-COR, Lincoln, NE, United States) and the ChemiDoc Imaging  
577 system (Bio-Rad, Hercules, CA, United States).

578

#### 579 **Measurement of (p)ppGpp**

580 Relative quantities of (p)ppGpp were measured by TLC of radiolabeled nucleotides as previously  
581 described (Drecktrah et al., 2015). *B. burgdorferi* 297 wild-type, the isogenic  $\Delta dksA$ , and  $\Delta dksA$   
582 pDksA strains were cultured to late-logarithmic growth density ( $1 \times 10^8$  spirochetes ml<sup>-1</sup>) in BSK  
583 II containing 20 µCi/ml <sup>32</sup>P-orthophosphate (PerkinElmer, Waltham, MA, United States) in 500  
584 µl volume, pelleted by centrifugation at 9,000 x *g* for 7 min, and resuspended in RPMI. Both

585 late-logarithmic growth density cultures (0 h) and cultures incubated in RPMI for 6 h were  
586 collected by centrifugation at 20,800 x *g* for 5 min at 4°C, cells washed once with dPBS, and cell  
587 pellet lysed with 6.5 M formic acid (Thermo Fisher Scientific, Grand Island, NY, United States).  
588 Cell debris were removed by centrifugation at 20,800 × *g* for 5 min at 4°C. The nucleotides were  
589 separated by TLC on polyethylenimine cellulose plates (EMD Millipore, Burlington, MA, United  
590 States) in 1.5 M KH<sub>2</sub>PO<sub>4</sub>, pH 3.4 buffer. After drying plates, radioactivity was detected by a 48 to  
591 72 h exposure to an intensifying screen and screens imaged by a Fujifilm FLA-3000G  
592 Phosphorimager (Fujifilm Life Sciences, Stamford, CT, United States). Values are expressed as a  
593 ratio of ppGpp/(total ppGpp + GTP) from the densitometry of three independent experiments.  
594 Mean values from three independent experiments were analyzed using one-way ANOVA and  
595 Tukey's post-hoc test to determine if differences were statistically significant.

#### 596 **Data Availability**

597 The microarray data have been submitted to the Gene Expression Omnibus (GEO accession:  
598 GSE119023).

#### 599 **AUTHOR CONTRIBUTIONS**

600 DD, DSS, FG, JB, WB, and TB contributed to the conception and design of the study; AG, JB, WB,  
601 and TB generated the bacterial strains required for the study; WB performed the data analysis,  
602 statistical tests, and wrote the sections of the manuscript; All authors contributed to  
603 manuscript revision, read and approved the submitted version.

#### 604 **FUNDING**

605 This research was supported by funding to TB from Creighton University and grants from the  
606 National Center for Research Resources (5P2ORR016469), the National Institute for General  
607 Medical Science (8P20GM103427); funding to DSS from the National Institute of Allergy and  
608 Infectious Diseases (R01AI051486); funding to JB through the Arkansas Biosciences Institute  
609 (major research component of the Arkansas Tobacco Settlement Proceeds Act of 2000),  
610 NIH/NIAID R01-AI087678, NIH/NIAID R21-AI 119532, as well as support through the UAMS  
611 Center for Microbial Pathogenesis and Host Inflammatory Responses (P20-GM103625); funding  
612 to AG from The Global Lyme Alliance Deborah and Mark Blackman Postdoctoral Fellowship; and  
613 funds from the Division of Intramural Research, National Institute for Allergy and Infectious  
614 Diseases, National Institutes of Health, Bethesda, MD, USA. Funders were not involved in study  
615 design, data collection, analysis, or interpretation, writing of the manuscript or decision on  
616 where to submit for publication.

617

#### 618 **ACKNOWLEDGEMENTS**



619 We would like to thank Rocky Mountain Laboratories Genomics unit and Dan Sturdevant for  
620 RNA expression analysis by Affymetrix Gene Chip, and Amanda Zulad, Crystal Richards, Daniel  
621 Dulebohn, and Sandy Stewart for critical review of the manuscript.

622 **SUPPLEMENTARY MATERIAL**

623 The Supplementary Material for this article can be found online at:

624 Conflict of Interest Statement: The authors declare that the research was conducted in the  
625 absence of any commercial or financial relationships that could be construed as a potential  
626 conflict of interest.

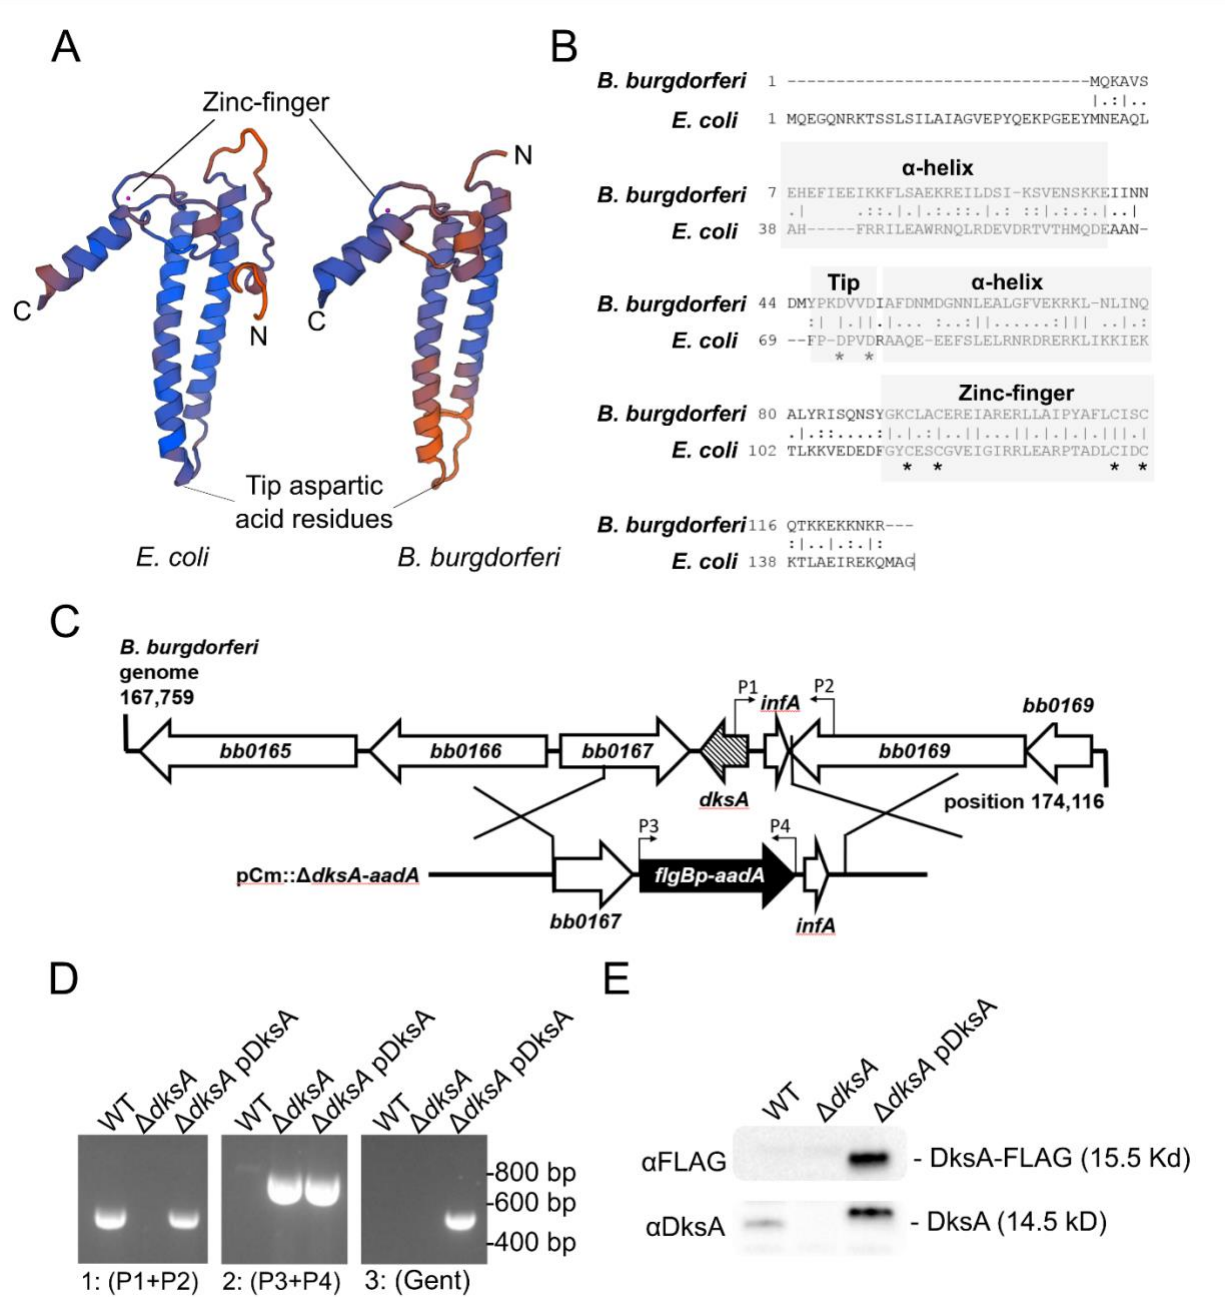

627

628 **FIGURE 1. Amino acid sequence analysis and mutagenesis of conserved *B. burgdorferi***  
 629 ***bb0168*-encoded *dksA*.** (A) SWISS-model of *E. coli* (left) and *B. burgdorferi* (right) DksA proteins  
 630 illustrate predicted structural similarities. Color scale from blue (high) to orange (low) encodes  
 631 Qmean score estimating model quality. Peptide N- and C-termini are indicated for each model.  
 632 (B) Amino acid sequence alignment of *B. burgdorferi* and *E. coli* DksA proteins. The boxes  
 633 indicate regions where *B. burgdorferi* DksA likely contains conserved coiled-coil  $\alpha$ -helices and a  
 634 zinc finger. The asterisks indicate key conserved aspartic acid and cysteine residues. (C) A  
 635 schematic of the *bb0168* (*dksA*) genomic location and homologous recombination mutagenesis  
 636 strategy. The open reading frame identity and direction is indicated by large arrows, and the

637 positions of the primers used in (D) are indicated by small arrows above the genes. **(D)**  
638 Homologous recombination between the *B. burgdorferi* genome and the plasmid encoding the  
639 600 bp segment containing *dksA*-flanking regions and the *aadA* antibiotic resistance cassette  
640 was confirmed by PCR. The  $\Delta dksA$  strain no longer possesses the *dksA* sequence as detected by  
641 PCR using the primers P1 and P2, and contains the *aadA* gene as detected with the primers P3  
642 and P4. Additionally, the  $\Delta dksA$  strain was *trans*-complemented with the pBSV2G-based pDksA  
643 plasmid and confirmed by the presence of *dksA* detected by PCR using the primers P1 and P2,  
644 *aadA* gene detected with the primers P3 and P4, and gentamicin resistance gene (*aacC1*) with  
645 the primers *aacC1* F/R primers. **(E)** Complementation was further confirmed by western blot  
646 using antibodies targeting the FLAG (upper panel) and DksA (lower panel) epitopes.

647

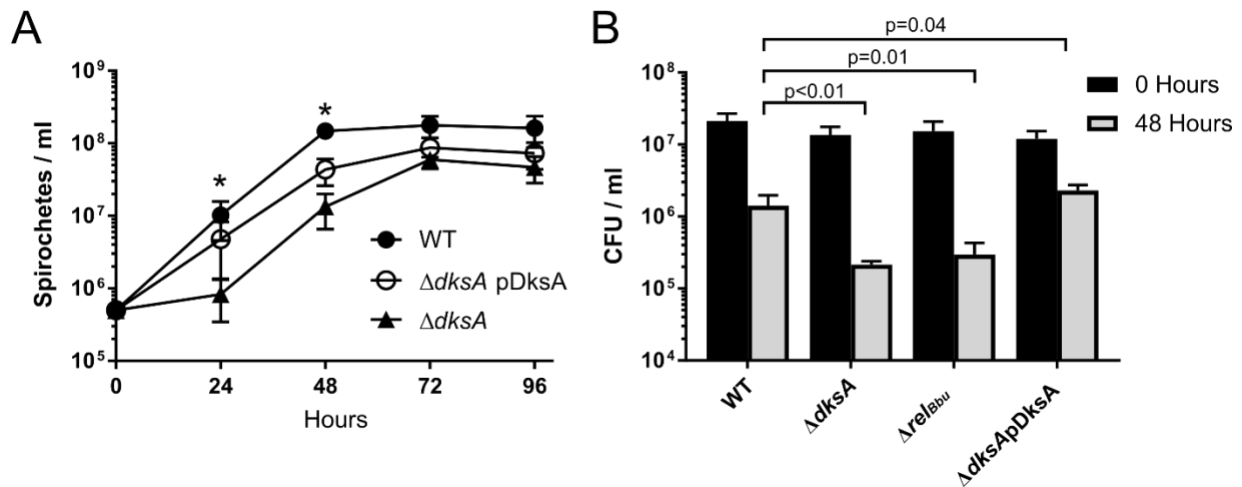

648

649 **FIGURE 2. Evaluation of *B. burgdorferi* growth rate and survival during long-term starvation.**  
650 **(A)** Growth of wild-type (WT),  $\Delta dksA$ , and  $\Delta dksA$  pDksA (passaged at  $5 \times 10^5$  spirochetes ml<sup>-1</sup>) in  
651 BSK II was assayed by enumeration at 24-h intervals. Data points represent the mean of four  
652 biological replicates. Error bars represent standard deviations and asterisks indicate  $p$ -values <  
653 0.05 by one-way ANOVA. **(B)** Wild-type (WT),  $\Delta dksA$ ,  $\Delta rel_{Bbu}$ , and  $\Delta dksA$  pDksA cultures grown  
654 to  $5 \times 10^7$  spirochete ml<sup>-1</sup> density in BSK II were pelleted and resuspended in RPMI for 0 or 48 h  
655 prior to growth in semi-solid BSK II. Data represent the mean of three independent  
656 experiments. The  $p$ -values were calculated by ANOVA with a Dunnett's multiple comparison for  
657 spirochete density following 48 h starvation in RPMI.

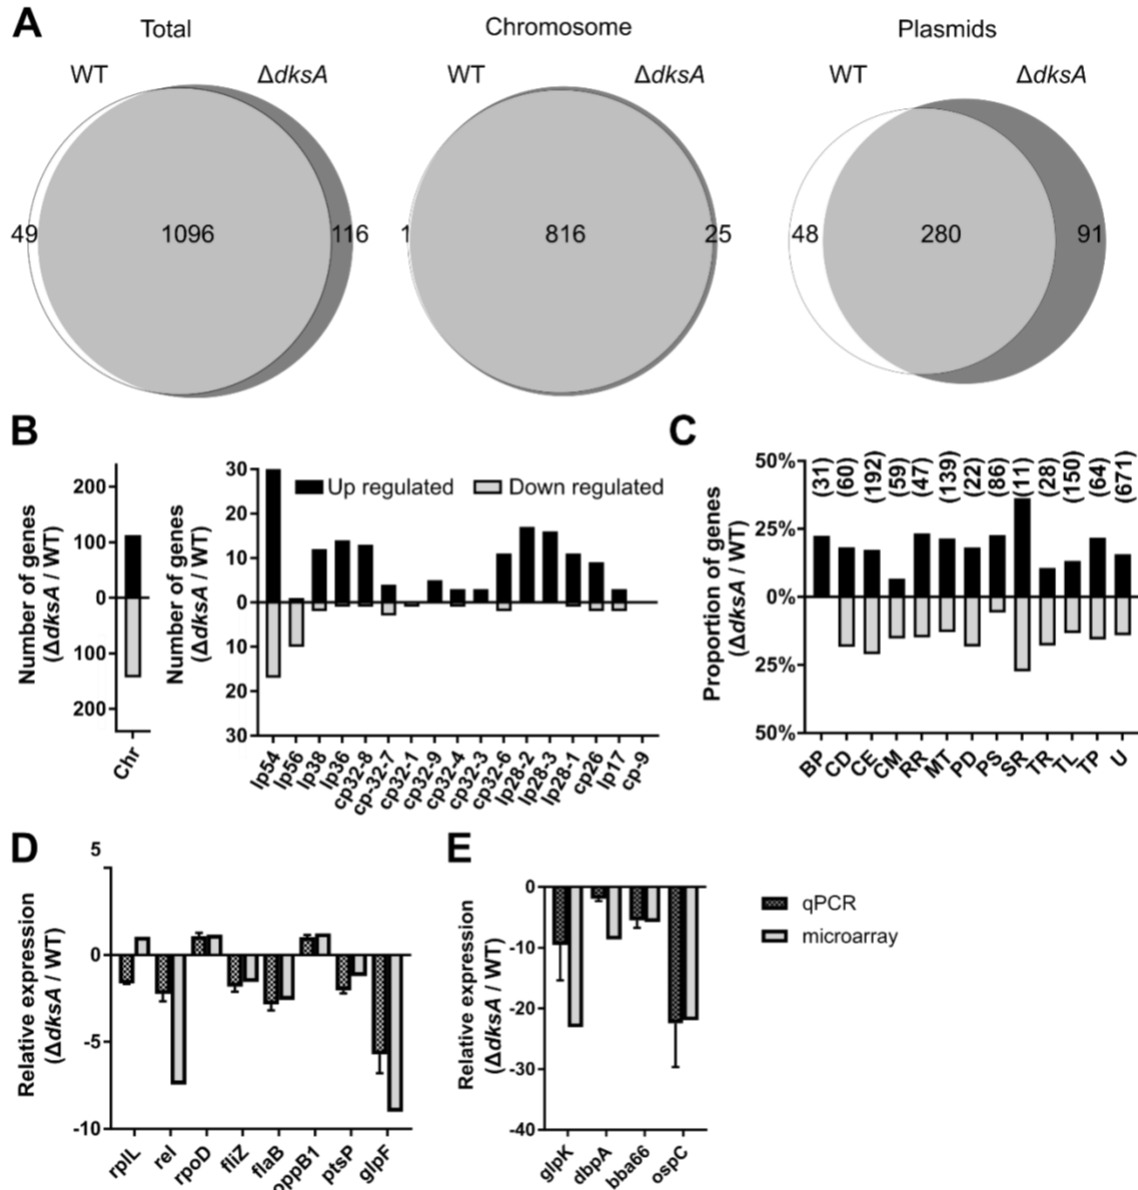

658

659

660 **FIGURE 3. Relative RNA expression between wild-type (WT) and  $\Delta dksA$  during logarithmic**  
 661 **phase growth. (A)** Venn diagrams illustrate the total number of genes expressed by WT and  
 662  $\Delta dksA$  during mid-log phase. Expression of individual genes was determined by detection of a  
 663 microarray hybridization signal above background among three biological and three intra-chip  
 664 hybridization replicates (left). Genes expressed by both WT and  $\Delta dksA$  are represented in the  
 665 intersect of the two circles and the genomic location (chromosome or plasmid) is indicated  
 666 (middle and right). **(B)** The number of genes upregulated (higher levels in  $\Delta dksA$  than in WT,  
 667 solid black bars) or downregulated (shaded bars) greater than two-fold and their genomic  
 668 location: chromosome (Chr), linear (Ip), or circular (cp) plasmids. Only comparisons with FDR-  
 669 adjusted  $p$ -value < 0.05 are shown. **(C)** Differentially expressed genes were functionally

670 categorized with the following abbreviations: BP, bacteriophage; CD, cell division; CE, cell  
671 envelope; CM, Chemotaxis; RR, DNA replication and repair; MT, metabolism; PD, protein  
672 degradation; PS, pseudogene; SR, stress response; TR, transcription; TL, translation; TP,  
673 transporter proteins; and U, unknown. The bars indicate percent of genes upregulated and  
674 downregulated relative to the total number of genes of each category and numbers above the  
675 bars indicate total number of genes within the respective functional group. **(D and E)** The  
676 differential regulation of select genes with high microarray signal quality or genes implicated in  
677 stringent response and infectivity were confirmed by RT-qPCR. Differential expression data by  
678 RT-qPCR and microarray are presented side by side and organized by function: ribosome (*rplL*),  
679 stringent response (*rel<sub>Bbu</sub>*), transcription (*rpoD*, *fliZ*), motility (*flaB*), transport (*bb0332*, *glpF*),  
680 metabolism (*ptsP*, *glpK*), lipoproteins (*dbpA*, *bba66*, *ospC*). Data represent the mean of four  
681 biological replicates and error bars indicate standard deviations.



689 represented within. **(C)** The number of differentially expressed genes by cultures of WT and **(D)**  
690 *ΔdksA* strains during starvation (RPMI) as compared to mid-log phase cultures (BSK II). Bars  
691 represent the number of genes differentially expressed on the chromosome (Chr), on the  
692 various plasmids, or the percent of genes differentially expressed within the annotated  
693 functional categories relative to genes within the respective functional groups. The bars  
694 indicating proportions in the following categories: BP, bacteriophage; CD, cell division; CE, cell  
695 envelope; CM, chemotaxis; RR, DNA replication and repair; MT, metabolism; PD, protein  
696 degradation; PS, pseudogene; SR, stress response; TR, transcription; TL, translation; TP,  
697 transporter proteins; and U, unknown. Numbers above the bars indicate the total number of  
698 genes within respective functional groups. Genes were considered differentially expressed if  
699 comparisons with FDR adjusted  $p$ -value  $< 0.05$  and differential expression of two-fold or more.

700



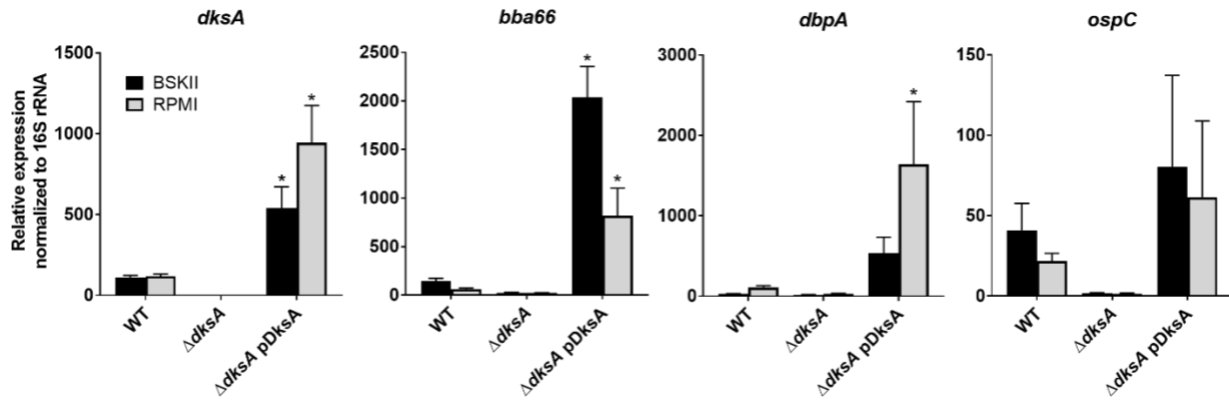

701

702 **FIGURE 5. Overexpression of DksA in the  $\Delta dksA$  pDksA strain coincides with increased**  
703 **expression of plasmid-encoded infectivity genes.** RT-qPCR was performed on RNA extracted  
704 from wild-type (WT),  $\Delta dksA$ , and  $\Delta dksA$  pDksA mid-logarithmic phase cultures (black) and  
705 cultures starved in RPMI (gray). Error bars represent standard deviation calculated from four  
706 biological replicates. The Dunnett's multiple comparison test was performed between strains  
707 for BSK II and RPMI conditions. The asterisk indicates  $p$ -value < 0.01 for expression level  
708 comparison between WT and  $\Delta dksA$ , or WT and  $\Delta dksA$  pDksA. Incubation in RPMI did not  
709 induce significant changes in expression of *dksA*, *bba66*, *dbpA*, or *ospC* for wild-type  
710 spirochetes.

711

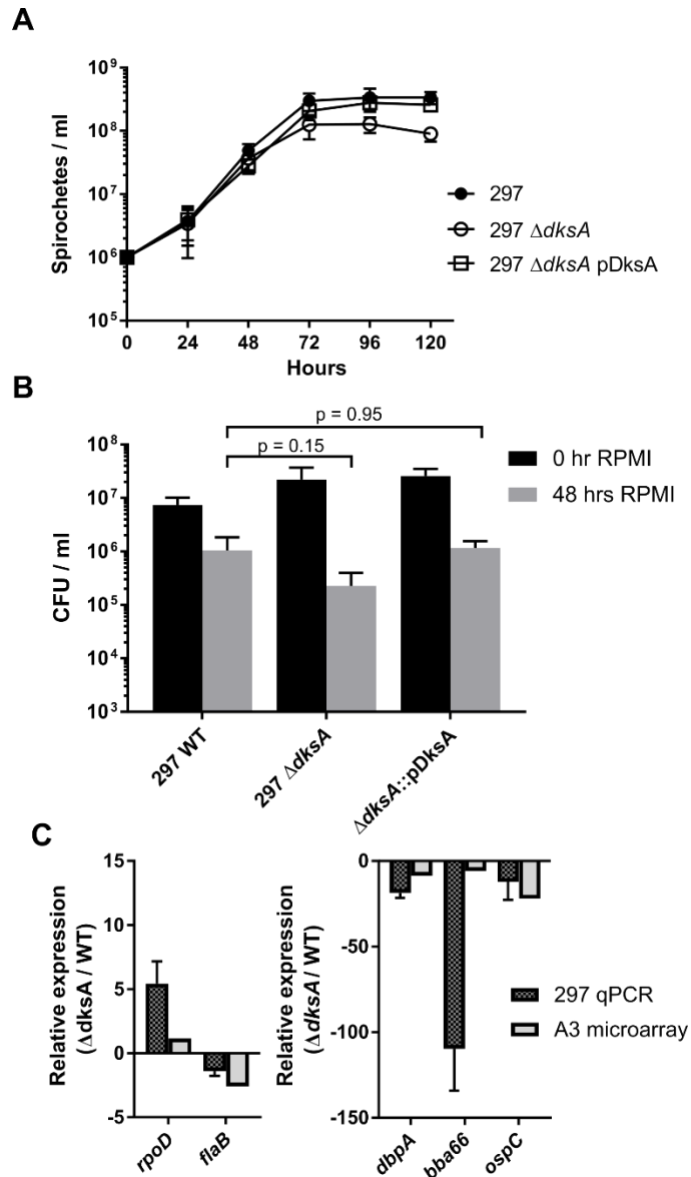

712

713 **FIGURE 6. Evaluation of growth, RPMI survival, and relative RNA expression phenotypes for *B.***  
714 ***burgdorferi* 297 wild-type (WT) and the 297  $\Delta dksA$  strains. (A)** Spirochetes were enumerated  
715 by microscopy. Values represent average from two replicates and bars indicate standard  
716 deviation. **(B)** Mid-logarithmic phase cultures of 297 wild-type,  $\Delta dksA$ , and  $\Delta dksA$  pDksA strains  
717 grown in BSK II were pelleted and re-suspended in RPMI for 0 or 48 h before plating on semi-  
718 solid BSK II medium and CFUs were enumerated following growth. The *p*-values represent  
719 ANOVA Dunnett's multiple comparison results of three replicate experiments. **(C)** Comparison  
720 of *dksA*-dependent gene expression in B31-A3 by microarray and 297 by RT-qPCR. Differential  
721 expression data of housekeeping genes (*rpoD* and *flaB*) and surface expressed lipoproteins  
722 (*dbpA*, *bba66*, *ospC*) are represented side by side. Relative expression values from RT-qPCR in  
723 the 297 strains represent 3 biological replicates and were normalized to 16S rRNA. Bars  
724 represent standard deviation.

725

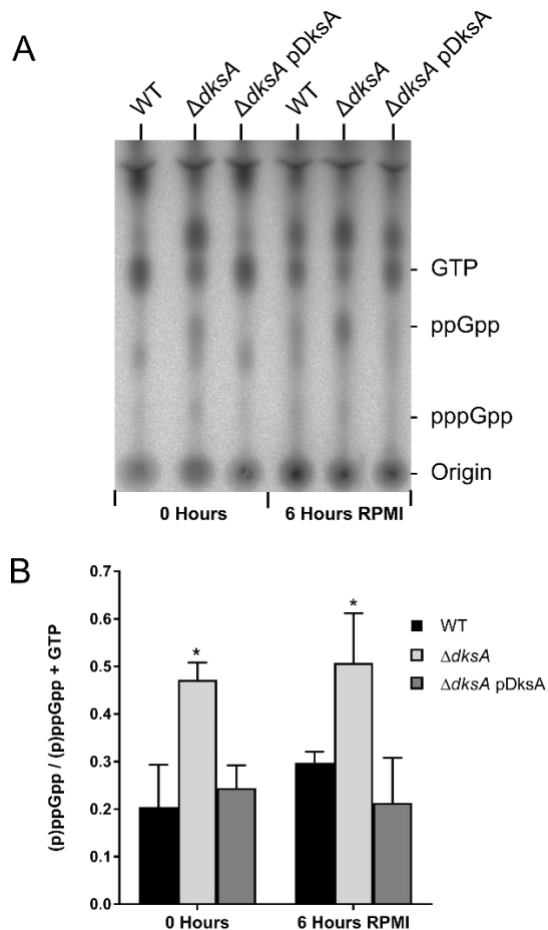

726

727

728 **FIGURE 7. The  $\Delta dksA$  mutant strain constitutively overproduces (p)ppGpp.** (A) Representative  
729 TLC image for analysis of radio-labeled nucleotides from 297 wild type (WT),  $\Delta dksA$ , and  $\Delta dksA$   
730 pDksA strains cultured in BSK II with  $^{32}\text{P}$ -orthophosphate. Spirochetes were grown to  $1 \times 10^8$   
731 spirochetes  $\text{ml}^{-1}$  (0 Hours) and starved in RPMI (6 Hours RPMI) before nucleotides were isolated  
732 and resolved by TLC. (B) Quantification of (p)ppGpp levels by densitometry. The values  
733 represent mean (p)ppGpp levels normalized to (p)ppGpp + GTP from three independent  
734 experiments. Error bars represent standard deviation. Asterisks indicate  $p$ -values  $< 0.05$ , as  
735 determined using one-way ANOVA Tukey's post-hoc test.

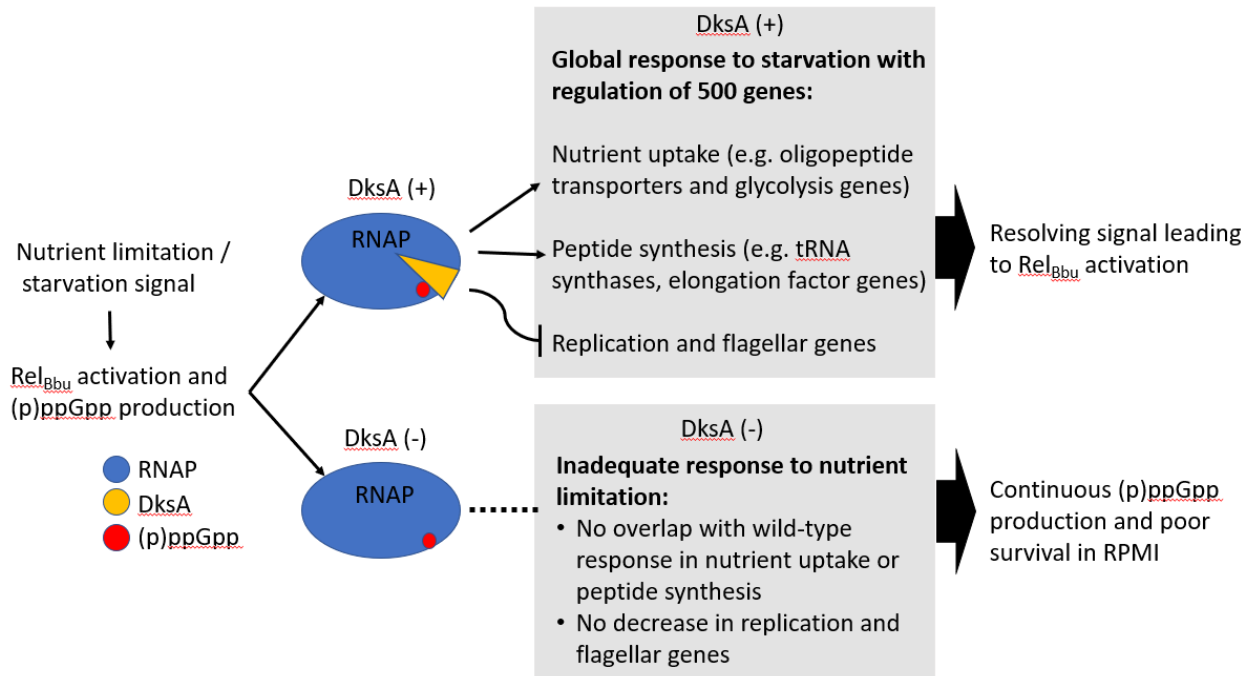

736

737 **FIGURE 8. Working model of the *B. burgdorferi* stringent response.** Both DksA and (p)ppGpp  
738 must interact with the RNA polymerase to exert transcriptional regulation during starvation  
739 conditions *in vitro*. In the absence of DksA, (p)ppGpp-dependent gene regulation appears  
740 largely lost, and despite the apparent overproduction of (p)ppGpp in DksA-deficient *B.*  
741 *burgdorferi*.

742

743

744 **REFERENCES**

- 745 Aberg, A., Fernandez-Vazquez, J., Cabrer-Panes, J.D., Sanchez, A., and Balsalobre, C. (2009). Similar and  
746 divergent effects of ppGpp and DksA deficiencies on transcription in *Escherichia coli*. *J Bacteriol*  
747 191, 3226-3236.
- 748 Benjamini, Y., Drai, D., Elmer, G., Kafkafi, N., and Golani, I. (2001). Controlling the false discovery rate in  
749 behavior genetics research. *Behav Brain Res* 125, 279-284.
- 750 Bernardo, L.M., Johansson, L.U., Skarfstad, E., and Shingler, V. (2009). sigma54-promoter discrimination  
751 and regulation by ppGpp and DksA. *J Biol Chem* 284, 828-838.
- 752 Blaby-Haas, C.E., Furman, R., Rodionov, D.A., Artsimovitch, I., and De Crecy-Lagard, V. (2011). Role of a  
753 Zn-independent DksA in Zn homeostasis and stringent response. *Mol Microbiol* 79, 700-715.
- 754 Boardman, B.K., He, M., Ouyang, Z., Xu, H., Pang, X., and Yang, X.F. (2008). Essential role of the response  
755 regulator Rrp2 in the infectious cycle of *Borrelia burgdorferi*. *Infect Immun* 76, 3844-3853.
- 756 Bontemps-Gallo, S., Lawrence, K., and Gherardini, F.C. (2016). Two Different Virulence-Related  
757 Regulatory Pathways in *Borrelia burgdorferi* Are Directly Affected by Osmotic Fluxes in the Blood  
758 Meal of Feeding Ixodes Ticks. *PLoS Pathog* 12, e1005791.
- 759 Bourret, T.J., Lawrence, K.A., Shaw, J.A., Lin, T., Norris, S.J., and Gherardini, F.C. (2016). The Nucleotide  
760 Excision Repair Pathway Protects *Borrelia burgdorferi* from Nitrosative Stress in Ixodes  
761 scapularis Ticks. *Front Microbiol* 7, 1397.
- 762 Branny, P., Pearson, J.P., Pesci, E.C., Kohler, T., Iglewski, B.H., and Van Delden, C. (2001). Inhibition of  
763 quorum sensing by a *Pseudomonas aeruginosa* dksA homologue. *J Bacteriol* 183, 1531-1539.
- 764 Brown, L., Gentry, D., Elliott, T., and Cashel, M. (2002). DksA affects ppGpp induction of RpoS at a  
765 translational level. *J Bacteriol* 184, 4455-4465.
- 766 Bugrysheva, J.V., Pappas, C.J., Terekhova, D.A., Iyer, R., Godfrey, H.P., Schwartz, I., and Cabello, F.C.  
767 (2015). Characterization of the RelBbu Regulon in *Borrelia burgdorferi* Reveals Modulation of  
768 Glycerol Metabolism by (p)ppGpp. *PLoS One* 10, e0118063.
- 769 Bunikis, I., Kutschan-Bunikis, S., Bonde, M., and Bergstrom, S. (2011). Multiplex PCR as a tool for  
770 validating plasmid content of *Borrelia burgdorferi*. *J Microbiol Methods* 86, 243-247.
- 771 Burtnick, M.N., Downey, J.S., Brett, P.J., Boylan, J.A., Frye, J.G., Hoover, T.R., and Gherardini, F.C. (2007).  
772 Insights into the complex regulation of rpoS in *Borrelia burgdorferi*. *Mol Microbiol* 65, 277-293.
- 773 Caimano, M.J., Drecktrah, D., Kung, F., and Samuels, D.S. (2016). Interaction of the Lyme disease  
774 spirochete with its tick vector. *Cell Microbiol* 18, 919-927.
- 775 Caimano, M.J., Dunham-Ems, S., Allard, A.M., Cassera, M.B., Kenedy, M., and Radolf, J.D. (2015). Cyclic  
776 di-GMP modulates gene expression in Lyme disease spirochetes at the tick-mammal interface to  
777 promote spirochete survival during the blood meal and tick-to-mammal transmission. *Infect*  
778 *Immun* 83, 3043-3060.
- 779 Caimano, M.J., Iyer, R., Eggers, C.H., Gonzalez, C., Morton, E.A., Gilbert, M.A., Schwartz, I., and Radolf,  
780 J.D. (2007). Analysis of the RpoS regulon in *Borrelia burgdorferi* in response to mammalian host  
781 signals provides insight into RpoS function during the enzootic cycle. *Mol Microbiol* 65, 1193-  
782 1217.
- 783 Chandrangsu, P., Lemke, J.J., and Gourse, R.L. (2011). The dksA promoter is negatively feedback  
784 regulated by DksA and ppGpp. *Mol Microbiol* 80, 1337-1348.
- 785 Concepcion, M.B., and Nelson, D.R. (2003). Expression of spoT in *Borrelia burgdorferi* during serum  
786 starvation. *J Bacteriol* 185, 444-452.

- 787 Crawford, M.A., Tapscott, T., Fitzsimmons, L.F., Liu, L., Reyes, A.M., Libby, S.J., Trujillo, M., Fang, F.C.,  
788 Radi, R., and Vazquez-Torres, A. (2016). Redox-Active Sensing by Bacterial DksA Transcription  
789 Factors Is Determined by Cysteine and Zinc Content. *MBio* 7, e02161-02115.
- 790 Dalebroux, Z.D., Svensson, S.L., Gaynor, E.C., and Swanson, M.S. (2010a). ppGpp conjures bacterial  
791 virulence. *Microbiol Mol Biol Rev* 74, 171-199.
- 792 Dalebroux, Z.D., Yagi, B.F., Sahr, T., Buchrieser, C., and Swanson, M.S. (2010b). Distinct roles of ppGpp  
793 and DksA in *Legionella pneumophila* differentiation. *Mol Microbiol* 76, 200-219.
- 794 Drecktrah, D., Hall, L.S., Rescheneder, P., Lybecker, M., and Samuels, D.S. (2018). The Stringent  
795 Response-Regulated sRNA Transcriptome of *Borrelia burgdorferi*. *Front Cell Infect Microbiol* 8,  
796 231.
- 797 Drecktrah, D., Lybecker, M., Popitsch, N., Rescheneder, P., Hall, L.S., and Samuels, D.S. (2015). The  
798 *Borrelia burgdorferi* RelA/SpoT Homolog and Stringent Response Regulate Survival in the Tick  
799 Vector and Global Gene Expression during Starvation. *PLoS Pathog* 11, e1005160.
- 800 Dulebohn, D.P., Richards, C.L., Su, H., Lawrence, K.A., and Gherardini, F.C. (2017). Weak Organic Acids  
801 Decrease *Borrelia burgdorferi* Cytoplasmic pH, Eliciting an Acid Stress Response and Impacting  
802 RpoN- and RpoS-Dependent Gene Expression. *Front Microbiol* 8, 1734.
- 803 Durfee, T., Hansen, A.M., Zhi, H., Blattner, F.R., and Jin, D.J. (2008). Transcription profiling of the  
804 stringent response in *Escherichia coli*. *J Bacteriol* 190, 1084-1096.
- 805 Elias, A.F., Bono, J.L., Kupko, J.J., 3rd, Stewart, P.E., Krum, J.G., and Rosa, P.A. (2003). New antibiotic  
806 resistance cassettes suitable for genetic studies in *Borrelia burgdorferi*. *J Mol Microbiol*  
807 *Biotechnol* 6, 29-40.
- 808 Elias, A.F., Stewart, P.E., Grimm, D., Caimano, M.J., Eggers, C.H., Tilly, K., Bono, J.L., Akins, D.R., Radolf,  
809 J.D., Schwan, T.G., and Rosa, P. (2002). Clonal polymorphism of *Borrelia burgdorferi* strain B31  
810 MI: implications for mutagenesis in an infectious strain background. *Infect Immun* 70, 2139-  
811 2150.
- 812 Fraser, C.M., Casjens, S., Huang, W.M., Sutton, G.G., Clayton, R., Lathigra, R., White, O., Ketchum, K.A.,  
813 Dodson, R., Hickey, E.K., Gwinn, M., Dougherty, B., Tomb, J.F., Fleischmann, R.D., Richardson, D.,  
814 Peterson, J., Kerlavage, A.R., Quackenbush, J., Salzberg, S., Hanson, M., Van Vugt, R., Palmer, N.,  
815 Adams, M.D., Gocayne, J., Weidman, J., Utterback, T., Wathney, L., McDonald, L., Artiach, P.,  
816 Bowman, C., Garland, S., Fuji, C., Cotton, M.D., Horst, K., Roberts, K., Hatch, B., Smith, H.O., and  
817 Venter, J.C. (1997). Genomic sequence of a Lyme disease spirochaete, *Borrelia burgdorferi*.  
818 *Nature* 390, 580-586.
- 819 Furman, R., Danhart, E.M., Nandymazumdar, M., Yuan, C., Foster, M.P., and Artsimovitch, I. (2015). pH  
820 dependence of the stress regulator DksA. *PLoS One* 10, e0120746.
- 821 Furman, R., Tsodikov, O.V., Wolf, Y.I., and Artsimovitch, I. (2013). An insertion in the catalytic trigger  
822 loop gates the secondary channel of RNA polymerase. *J Mol Biol* 425, 82-93.
- 823 Garcia, B.L., Zhi, H., Wager, B., Hook, M., and Skare, J.T. (2016). *Borrelia burgdorferi* BBK32 Inhibits the  
824 Classical Pathway by Blocking Activation of the C1 Complement Complex. *PLoS Pathog* 12,  
825 e1005404.
- 826 Gentry, D.R., Hernandez, V.J., Nguyen, L.H., Jensen, D.B., and Cashel, M. (1993). Synthesis of the  
827 stationary-phase sigma factor sigma s is positively regulated by ppGpp. *J Bacteriol* 175, 7982-  
828 7989.
- 829 Gherardini, F.C., Boylan, J.A., Lawrence, K.A., and Skare, J.T. (2010). "Metabolism and physiology of  
830 *Borrelia*," in *Borrelia: Molecular Biology, Host Interaction and Pathogenesis*. (Norfolk, UK:  
831 Caister Academic Press), 103-138.
- 832 Gray, J.S., Kahl, O., Lane, R.S., Levin, M.L., and Tsao, J.I. (2016). Diapause in ticks of the medically  
833 important *Ixodes ricinus* species complex. *Ticks Tick Borne Dis* 7, 992-1003.

- 834 Groshong, A.M., Dey, A., Bezsonova, I., Caimano, M.J., and Radolf, J.D. (2017). Peptide Uptake Is  
835 Essential for *Borrelia burgdorferi* Viability and Involves Structural and Regulatory Complexity of  
836 its Oligopeptide Transporter. *MBio* 8.
- 837 Gulia-Nuss, M., Nuss, A.B., Meyer, J.M., Sonenshine, D.E., Roe, R.M., Waterhouse, R.M., Sattelle, D.B.,  
838 De La Fuente, J., Ribeiro, J.M., Megy, K., Thimmapuram, J., Miller, J.R., Walenz, B.P., Koren, S.,  
839 Hostetler, J.B., Thiagarajan, M., Joardar, V.S., Hannick, L.I., Bidwell, S., Hammond, M.P., Young,  
840 S., Zeng, Q., Abrudan, J.L., Almeida, F.C., Ayllon, N., Bhide, K., Bissinger, B.W., Bonzon-  
841 Kulichenko, E., Buckingham, S.D., Caffrey, D.R., Caimano, M.J., Croset, V., Driscoll, T., Gilbert, D.,  
842 Gillespie, J.J., Giraldo-Calderon, G.I., Grabowski, J.M., Jiang, D., Khalil, S.M., Kim, D., Kocan, K.M.,  
843 Koci, J., Kuhn, R.J., Kurtti, T.J., Lees, K., Lang, E.G., Kennedy, R.C., Kwon, H., Perera, R., Qi, Y.,  
844 Radolf, J.D., Sakamoto, J.M., Sanchez-Gracia, A., Severo, M.S., Silverman, N., Simo, L., Tojo, M.,  
845 Tornador, C., Van Zee, J.P., Vazquez, J., Vieira, F.G., Villar, M., Wespiser, A.R., Yang, Y., Zhu, J.,  
846 Arensbarger, P., Pietrantonio, P.V., Barker, S.C., Shao, R., Zdobnov, E.M., Hauser, F.,  
847 Grimmelikhuijzen, C.J., Park, Y., Rozas, J., Benton, R., Pedra, J.H., Nelson, D.R., Unger, M.F.,  
848 Tubio, J.M., Tu, Z., Robertson, H.M., Shumway, M., Sutton, G., Wortman, J.R., Lawson, D., Wikel,  
849 S.K., Nene, V.M., Fraser, C.M., Collins, F.H., Birren, B., Nelson, K.E., Caler, E., and Hill, C.A. (2016).  
850 Genomic insights into the *Ixodes scapularis* tick vector of Lyme disease. *Nat Commun* 7, 10507.
- 851 Hauryliuk, V., Atkinson, G.C., Murakami, K.S., Tenson, T., and Gerdes, K. (2015). Recent functional  
852 insights into the role of (p)ppGpp in bacterial physiology. *Nat Rev Microbiol* 13, 298-309.
- 853 He, M., Ouyang, Z., Troxell, B., Xu, H., Moh, A., Piesman, J., Norgard, M.V., Gomelsky, M., and Yang, X.F.  
854 (2011). Cyclic di-GMP is essential for the survival of the Lyme disease spirochete in ticks. *PLoS*  
855 *Pathog* 7, e1002133.
- 856 Henard, C.A., Tapscott, T., Crawford, M.A., Husain, M., Doulias, P.T., Porwollik, S., Liu, L., McClelland, M.,  
857 Ischiropoulos, H., and Vazquez-Torres, A. (2014). The 4-cysteine zinc-finger motif of the RNA  
858 polymerase regulator DksA serves as a thiol switch for sensing oxidative and nitrosative stress.  
859 *Mol Microbiol* 91, 790-804.
- 860 Henard, C.A., and Vazquez-Torres, A. (2012). DksA-dependent resistance of *Salmonella enterica* serovar  
861 Typhimurium against the antimicrobial activity of inducible nitric oxide synthase. *Infect Immun*  
862 80, 1373-1380.
- 863 Holley, C.L., Zhang, X., Fortney, K.R., Ellinger, S., Johnson, P., Baker, B., Liu, Y., Janowicz, D.M., Katz, B.P.,  
864 Munson, R.S., Jr., and Spinola, S.M. (2015). DksA and (p)ppGpp have unique and overlapping  
865 contributions to *Haemophilus ducreyi* pathogenesis in humans. *Infect Immun* 83, 3281-3292.
- 866 Hughes, C.A., Kodner, C.B., and Johnson, R.C. (1992). DNA analysis of *Borrelia burgdorferi* NCH-1, the  
867 first northcentral U.S. human Lyme disease isolate. *J Clin Microbiol* 30, 698-703.
- 868 Iyer, R., Caimano, M.J., Luthra, A., Axline, D., Jr., Corona, A., Iacobas, D.A., Radolf, J.D., and Schwartz, I.  
869 (2015). Stage-specific global alterations in the transcriptomes of Lyme disease spirochetes  
870 during tick feeding and following mammalian host adaptation. *Mol Microbiol* 95, 509-538.
- 871 Iyer, R., and Schwartz, I. (2016). Microarray-Based Comparative Genomic and Transcriptome Analysis of  
872 *Borrelia burgdorferi*. *Microarrays (Basel)* 5.
- 873 Kvint, K., Farewell, A., and Nystrom, T. (2000). RpoS-dependent promoters require guanosine  
874 tetraphosphate for induction even in the presence of high levels of sigma(s). *J Biol Chem* 275,  
875 14795-14798.
- 876 Lafay, B., Lloyd, A.T., Mclean, M.J., Devine, K.M., Sharp, P.M., and Wolfe, K.H. (1999). Proteome  
877 composition and codon usage in spirochaetes: species-specific and DNA strand-specific  
878 mutational biases. *Nucleic Acids Res* 27, 1642-1649.
- 879 Lemke, J.J., Durfee, T., and Gourse, R.L. (2009). DksA and ppGpp directly regulate transcription of the  
880 *Escherichia coli* flagellar cascade. *Mol Microbiol* 74, 1368-1379.

- 881 Lennon, C.W., Ross, W., Martin-Tumasz, S., Touloukhonov, I., Vrentas, C.E., Rutherford, S.T., Lee, J.H.,  
882 Butcher, S.E., and Gourse, R.L. (2012). Direct interactions between the coiled-coil tip of DksA and  
883 the trigger loop of RNA polymerase mediate transcriptional regulation. *Genes Dev* 26, 2634-  
884 2646.
- 885 Li, X., Pal, U., Ramamoorthi, N., Liu, X., Desrosiers, D.C., Eggers, C.H., Anderson, J.F., Radolf, J.D., and  
886 Fikrig, E. (2007). The Lyme disease agent *Borrelia burgdorferi* requires BB0690, a Dps  
887 homologue, to persist within ticks. *Mol Microbiol* 63, 694-710.
- 888 Lin, Y.P., Chen, Q., Ritchie, J.A., Dufour, N.P., Fischer, J.R., Coburn, J., and Leong, J.M. (2015).  
889 Glycosaminoglycan binding by *Borrelia burgdorferi* adhesin BBK32 specifically and uniquely  
890 promotes joint colonization. *Cell Microbiol* 17, 860-875.
- 891 Lyzen, R., Maitra, A., Milewska, K., Kochanowska-Lyzen, M., Hernandez, V.J., and Szalewska-Palasz, A.  
892 (2016). The dual role of DksA protein in the regulation of *Escherichia coli* pArgX promoter.  
893 *Nucleic Acids Res* 44, 10316-10325.
- 894 Magnusson, L.U., Gummesson, B., Joksimovic, P., Farewell, A., and Nystrom, T. (2007). Identical,  
895 independent, and opposing roles of ppGpp and DksA in *Escherichia coli*. *J Bacteriol* 189, 5193-  
896 5202.
- 897 Molodtsov, V., Sineva, E., Zhang, L., Huang, X., Cashel, M., Ades, S.E., and Murakami, K.S. (2018).  
898 Allosteric Effector ppGpp Potentiates the Inhibition of Transcript Initiation by DksA. *Mol Cell* 69,  
899 828-839 e825.
- 900 Nakanishi, N., Abe, H., Ogura, Y., Hayashi, T., Tashiro, K., Kuhara, S., Sugimoto, N., and Tobe, T. (2006).  
901 ppGpp with DksA controls gene expression in the locus of enterocyte effacement (LEE)  
902 pathogenicity island of enterohaemorrhagic *Escherichia coli* through activation of two virulence  
903 regulatory genes. *Mol Microbiol* 61, 194-205.
- 904 Ouyang, Z., Blevins, J.S., and Norgard, M.V. (2008). Transcriptional interplay among the regulators Rrp2,  
905 RpoN and RpoS in *Borrelia burgdorferi*. *Microbiology* 154, 2641-2658.
- 906 Pal, R.R., Bag, S., Dasgupta, S., Das, B., and Bhadra, R.K. (2012). Functional characterization of the  
907 stringent response regulatory gene *dksA* of *Vibrio cholerae* and its role in modulation of  
908 virulence phenotypes. *J Bacteriol* 194, 5638-5648.
- 909 Pappas, C.J., Iyer, R., Petzke, M.M., Caimano, M.J., Radolf, J.D., and Schwartz, I. (2011). *Borrelia*  
910 *burgdorferi* requires glycerol for maximum fitness during the tick phase of the enzootic cycle.  
911 *PLoS Pathog* 7, e1002102.
- 912 Patton, T.G., Brandt, K.S., Nolder, C., Clifton, D.R., Carroll, J.A., and Gilmore, R.D. (2013). *Borrelia*  
913 *burgdorferi* bba66 gene inactivation results in attenuated mouse infection by tick transmission.  
914 *Infect Immun* 81, 2488-2498.
- 915 Paul, B.J., Barker, M.M., Ross, W., Schneider, D.A., Webb, C., Foster, J.W., and Gourse, R.L. (2004). DksA:  
916 a critical component of the transcription initiation machinery that potentiates the regulation of  
917 rRNA promoters by ppGpp and the initiating NTP. *Cell* 118, 311-322.
- 918 Paul, B.J., Berkmen, M.B., and Gourse, R.L. (2005). DksA potentiates direct activation of amino acid  
919 promoters by ppGpp. *Proc Natl Acad Sci U S A* 102, 7823-7828.
- 920 Perederina, A., Svetlov, V., Vassilyeva, M.N., Tahirov, T.H., Yokoyama, S., Artsimovitch, I., and Vassilyev,  
921 D.G. (2004). Regulation through the secondary channel--structural framework for ppGpp-DksA  
922 synergism during transcription. *Cell* 118, 297-309.
- 923 Potrykus, K., and Cashel, M. (2008). (p)ppGpp: still magical? *Annu Rev Microbiol* 62, 35-51.
- 924 Promnares, K., Kumar, M., Shroder, D.Y., Zhang, X., Anderson, J.F., and Pal, U. (2009). *Borrelia*  
925 *burgdorferi* small lipoprotein Lp6.6 is a member of multiple protein complexes in the outer  
926 membrane and facilitates pathogen transmission from ticks to mice. *Mol Microbiol* 74, 112-125.
- 927 Radolf, J.D., Caimano, M.J., Stevenson, B., and Hu, L.T. (2012). Of ticks, mice and men: understanding the  
928 dual-host lifestyle of Lyme disease spirochaetes. *Nat Rev Microbiol* 10, 87-99.



- 929 Rao, N.N., Liu, S., and Kornberg, A. (1998). Inorganic polyphosphate in *Escherichia coli*: the phosphate  
930 regulon and the stringent response. *J Bacteriol* 180, 2186-2193.
- 931 Richards, C.L., Lawrence, K.A., Su, H., Yang, Y., Yang, X.F., Dulebohn, D.P., and Gherardini, F.C. (2015).  
932 Acetyl-Phosphate Is Not a Global Regulatory Bridge between Virulence and Central Metabolism  
933 in *Borrelia burgdorferi*. *PLoS One* 10, e0144472.
- 934 Rogers, E.A., Terekhova, D., Zhang, H.M., Hovis, K.M., Schwartz, I., and Marconi, R.T. (2009). Rrp1, a  
935 cyclic-di-GMP-producing response regulator, is an important regulator of *Borrelia burgdorferi*  
936 core cellular functions. *Mol Microbiol* 71, 1551-1573.
- 937 Ross, W., Sanchez-Vazquez, P., Chen, A.Y., Lee, J.H., Burgos, H.L., and Gourse, R.L. (2016). ppGpp Binding  
938 to a Site at the RNAP-DksA Interface Accounts for Its Dramatic Effects on Transcription Initiation  
939 during the Stringent Response. *Mol Cell* 62, 811-823.
- 940 Samuels, D.S. (2011). Gene regulation in *Borrelia burgdorferi*. *Annu Rev Microbiol* 65, 479-499.
- 941 Samuels, D.S., Drecktrah, D., and Hall, L.S. (2018). Genetic Transformation and Complementation.  
942 *Methods Mol Biol* 1690, 183-200.
- 943 Sharma, A.K., and Payne, S.M. (2006). Induction of expression of hfq by DksA is essential for *Shigella*  
944 *flexneri* virulence. *Mol Microbiol* 62, 469-479.
- 945 Sherlock, M.E., Sudarsan, N., and Breaker, R.R. (2018). Riboswitches for the alarmone ppGpp expand the  
946 collection of RNA-based signaling systems. *Proc Natl Acad Sci U S A* 115, 6052-6057.
- 947 Sonenshine, D.E. (1991). *Biology of ticks*. New York: Oxford University Press.
- 948 Steinchen, W., and Bange, G. (2016). The magic dance of the alarmones (p)ppGpp. *Mol Microbiol* 101,  
949 531-544.
- 950 Tilly, K., Elias, A.F., Errett, J., Fischer, E., Iyer, R., Schwartz, I., Bono, J.L., and Rosa, P. (2001). Genetics and  
951 regulation of chitobiose utilization in *Borrelia burgdorferi*. *J Bacteriol* 183, 5544-5553.
- 952 Tilly, K., Krum, J.G., Bestor, A., Jewett, M.W., Grimm, D., Bueschel, D., Byram, R., Dorward, D., Vanraden,  
953 M.J., Stewart, P., and Rosa, P. (2006). *Borrelia burgdorferi* OspC protein required exclusively in a  
954 crucial early stage of mammalian infection. *Infect Immun* 74, 3554-3564.
- 955 Traxler, M.F., Summers, S.M., Nguyen, H.T., Zacharia, V.M., Hightower, G.A., Smith, J.T., and Conway, T.  
956 (2008). The global, ppGpp-mediated stringent response to amino acid starvation in *Escherichia*  
957 *coli*. *Mol Microbiol* 68, 1128-1148.
- 958 Webb, C., Moreno, M., Wilmes-Riesenberg, M., Curtiss, R., 3rd, and Foster, J.W. (1999). Effects of DksA  
959 and ClpP protease on sigma S production and virulence in *Salmonella typhimurium*. *Mol*  
960 *Microbiol* 34, 112-123.
- 961 Xiang, X., Yang, Y., Du, J., Lin, T., Chen, T., Yang, X.F., and Lou, Y. (2017). Investigation of ospC Expression  
962 Variation among *Borrelia burgdorferi* Strains. *Front Cell Infect Microbiol* 7, 131.
